# Supplementary material for: Stereoselective synthesis of 1′-α-cyano carbocyclic pyrimidine nucleoside analogs via a chelation-controlled 1′-α-hydroxymethylation strategy
Source: Royal Society of Chemistry journal article supplement (doi:10.1039/d6ob00377j), 2026-05-08
Supplement: d6ob00377j1.pdf [file d6ob00377j1.pdf]

Supporting Information

**Stereoselective Synthesis of 1'- $\alpha$ -Cyano Carbocyclic Pyrimidine Nucleoside**

**Analogs via a Chelation-controlled 1'- $\alpha$ -Hydroxymethylation Strategy**

Nicolas. G. Biteau, Mahesh Kasthuri, Dharmeshkumar Patel<sup>1</sup> Ramyani De, Raymond. F. Schinazi,<sup>1\*</sup> Franck Amblard.<sup>1\*</sup>

Center for ViroScience/Cure, Laboratory of Biochemical Pharmacology, Department of Pediatrics, Emory University School of Medicine, and Children's Healthcare of Atlanta, 1760 Haygood Drive, Atlanta, GA 30322, USA.

[rschina@emory.edu](mailto:rschina@emory.edu), [famblar@emory.edu](mailto:famblar@emory.edu).

|                                                                                       |         |
|---------------------------------------------------------------------------------------|---------|
| General information                                                                   | S1-S2   |
| Synthetic procedures                                                                  | S2-S8   |
| NMR Spectral data ( <sup>1</sup> H, <sup>13</sup> C, <sup>31</sup> P, COSY and NOESY) | S9-S22  |
| X-ray crystallographic data of intermediate 9A (Figures 1 and 2, Tables 1-8)          | S22-S46 |
| Table 9. Antiviral activity of compounds 1-4.                                         | S47     |
| Table 10: Cytotoxicity profile of compounds 1-4.                                      | S47     |
| References                                                                            | S47     |

General Information:

Anhydrous solvents were purchased from Millipore Sigma (Milwaukee, WI, USA). All commercially available reagents were used without further purification. Reagents were purchased from commercial sources. All the reactions were carried out under nitrogen in oven-dried glassware unless otherwise noted. Thin layer chromatography was performed on Analtech GHLF silica gel plates. Column chromatography was accomplished on Combi- flash Rf200 or via reverse-phase high-performance liquid chromatography. <sup>1</sup>H, <sup>13</sup>C, and <sup>19</sup>F NMR spectra were recorded on a Bruker Ascend 400 spectrometer at rt (400, 101, and 377 MHz) and residual proton solvent signals were used as internal standards. Deuterium exchange and decoupling experiments were utilized to confirm proton assignments. NMR processing was performed with MestReNova (Mestrelab Research, Compostela, Spain) version 14.1.1 24571 or Topspin (Bruker, Berlin, Germany) version 3.5. Signal multiplicities are represented by s (singlet), d (doublet), dd (doublet of doublets), t (triplet), q (quadru-plet), br (broad), bs (broad singlet), and m (multiplet). Coupling constants (*J*) are in hertz (Hz). Mass spectra were determined on a Waters Acquity

ultraperformance liquid chromatography (UPLC) spectrometer using a SQ detector with electrospray ionization. The purity of final compounds was determined to be >95% using UPLC analyses performed on a Waters Acquity UPLC System with a Kinetex LC column (2.1 mm, 50 mm, 1.7  $\mu$ m, C18, 100 Å) and further supported by clean NMR spectra. Mobile phase flow was 0.4 mL/min with a 1.20 min gradient from 95% aqueous media (0.05% formic acid) to 95% CH<sub>3</sub>CN (0.05% formic acid) and a 4.5 min total acquisition time. Photodiode array detection was from 190 to 360 nm.

**Synthesis of 1-((6*aR*,8*S*,9*aR*)-8-(hydroxymethyl)-2,2,4,4-tetraisopropyl-9-oxohexahydrocyclopenta[*f*][1,3,5,2,4]trioxadisilocin-8-yl)pyrimidine-2,4(1*H*,3*H*)-dione – 7.**

Under an inert atmosphere, compound **6** (1.31 g, 2.71 mmol) was dissolved in dry THF (30 mL) and cooled to -78 °C. LDA (2.5 M in hexanes, 2.28 mL, 5.7 mmol) was added dropwise, and the reaction mixture was allowed to warm to 0 °C and stirred for 10 min. The mixture was then cooled again to -78 °C, and paraformaldehyde (0.65 g, 21.68 mmol) was added. The reaction was allowed to gradually warm to room temperature and stirred for 6 h. Upon completion, the mixture was quenched with 1 M HCl, diluted with saturated NaHCO<sub>3</sub> (100 mL), and extracted with ethyl acetate (3  $\times$  75 mL). The combined organic layers were washed with saturated brine (60 mL), dried over anhydrous MgSO<sub>4</sub>, filtered, and concentrated under reduced pressure. The crude residue was purified by flash chromatography (0-100% ethyl acetate in hexane) to afford the desired compound **7** (0.77 g, 50%) as a white foam. <sup>1</sup>H NMR (400 MHz, Acetone-*d*<sub>6</sub>)  $\delta$  10.09 (s, 1H), 8.03 (d, 1H, *J* = 8.4 Hz), 5.64 (d, 1H, *J* = 8.3 Hz), 5.04 (t, 1H, *J* = 5.4 Hz), 4.98 (d, 1H, *J* = 10.4 Hz), 4.10-3.84 (m, 4H), 2.45-2.41 (m, 1H), 2.19-1.96 (m, 2H), 1.14-0.92 (m, 28H). <sup>13</sup>C NMR (101 MHz, Acetone-*d*<sub>6</sub>)  $\delta$  171.8, 164.2, 152.7, 144.7, 103.1, 76.4, 69.5, 63.4, 61.8, 61.4, 44.0, 28.4, 18.8, 18.7, 18.7, 18.6, 18.5, 18.3, 18.3, 15.1, 14.8, 14.3, 14.0. HRMS-ESI (*m/z*) [M+H]<sup>+</sup> calcd. 513.2374. for C<sub>23</sub>H<sub>41</sub>N<sub>2</sub>O<sub>7</sub>Si<sub>2</sub>: found 513.2441.

**Synthesis of 1-((6*aR*,8*S*,9*aR*)-8-(hydroxymethyl)-2,2,4,4-tetraisopropyl-9-oxohexahydrocyclopenta[*f*][1,3,5]trioxocin-8-yl)pyrimidine-2,4(1*H*,3*H*)-dione – 8.** At 0 °C, a solution of compound **7** (0.54 g, 1.05 mmol) in dry pyridine (15 mL) was treated with acetic anhydride (0.16 mL, 1.68 mmol). The reaction mixture was stirred at room temperature for 4 h, then diluted with ethyl acetate (100 mL) and washed sequentially with 1 M HCl (25 mL), saturated

NaHCO<sub>3</sub> (40 mL), and saturated brine (30 mL). The organic phase was dried over anhydrous MgSO<sub>4</sub>, filtered, and concentrated under reduced pressure. The crude residue was purified by flash column chromatography (0-50% ethyl acetate in hexane) to afford the desired compound **8** (0.42 g, 73%) as a white foam. <sup>1</sup>H NMR (400 MHz, Acetone-*d*<sub>6</sub>) δ 10.15 (s, 1H), 7.81 (d, 1H, *J* = 8.2 Hz), 5.63 (d, 1H, *J* = 8.2 Hz), 5.01-4.95 (m, 1H), 4.60 (d, 1H, *J* = 13.4 Hz), 4.31 (d, 1H, *J* = 13.4 Hz), 4.08 (d, 1H, *J* = 14.1 Hz), 3.91 (d, 1H, *J* = 14.1 Hz), 2.29-2.21 (m, 3H), 2.12 (s, 3H), 1.29-0.86 (m, 28H). <sup>13</sup>C NMR (101 MHz, Acetone-*d*<sub>6</sub>) δ 206.1, 169.4 164.1, 150.9, 142.0, 101.8, 74.6, 66.0, 63.4, 61.7, 60.9, 42.2, 27.9, 19.7, 17.0, 16.9, 16.9, 16.8, 16.5, 16.4, 13.4, 13.3, 13.0, 12.6, 12.3. HRMS-ESI (*m/z*) [M+H]<sup>+</sup> calcd. 555.2480. for C<sub>25</sub>H<sub>43</sub>N<sub>2</sub>O<sub>8</sub>Si<sub>2</sub>: found 555.2574.

**Synthesis of ((6*aR*,8*S*,9*aR*)-8-(2,4-dioxo-3,4-dihydropyrimidin-1(2*H*)-yl)-2,2,4,4-tetraisopropyl-9-oxohexahydrocyclopenta[*f*][1,3,5]trioxocin-8-yl)methyl acetate - 9.** To a solution of compound **8** (1.01 g, 1.82 mmol) in methanol (52 mL) at 0 °C was added sodium borohydride (0.19 g, 5.18 mmol). After 1.5 h, the reaction mixture was diluted with saturated NH<sub>4</sub>Cl (100 mL) and extracted with ethyl acetate (3 × 50 mL). The combined organic extracts were washed with saturated brine (40 mL), dried over MgSO<sub>4</sub>, filtered, and concentrated *in vacuo*. The crude residue was purified by flash chromatography (0-60% ethyl acetate in hexane) to afford the desired compound **9** (0.77 g, 76%) as a white foam. <sup>1</sup>H NMR (400 MHz, Acetone-*d*<sub>6</sub>) δ 9.89 (s, 1H), 7.98 (d, 1H, *J* = 8.3 Hz), 5.56 (d, 1H, *J* = 8.4 Hz), 5.73 (d, 1H, *J* = 12.1 Hz), 4.53-4.49 (m, 2H), 4.40-4.37 (m, 1H), 4.14 (d, 1H, *J* = 7.5 Hz), 4.00 (dd, 1H, *J* = 11.6, 3.8 Hz), 3.84 (dd, 1H, *J* = 11.8, 1.9 Hz), 2.81-2.74 (m, 1H), 2.38-2.33 (m, 1H), 1.94 (s, 3H), 1.61-1.64 (m, 1H), 1.13-0.86 (m, 28H). <sup>13</sup>C NMR (101 MHz, Acetone-*d*<sub>6</sub>) δ 170.0, 162.6, 151.5, 143.6, 100.7, 76.9, 72.9, 70.6, 64.7, 63.0, 46.4, 32.4, 19.8, 17.8, 17.7, 17.7, 17.7, 17.6, 17.3, 14.3, 14.1, 13.6, 13.5. HRMS-ESI (*m/z*) [M+H]<sup>+</sup> calcd. 557.2636. for C<sub>25</sub>H<sub>45</sub>N<sub>2</sub>O<sub>8</sub>Si<sub>2</sub>: found 557.2723.

**Synthesis of ((6*aR*,8*S*,9*S*,9*aR*)-8-(2,4-dioxo-3,4-dihydropyrimidin-1(2*H*)-yl)-9-hydroxy-2,2,4,4-tetraisopropylhexahydrocyclopenta[*f*][1,3,5]trioxocin-8-yl)methyl acetate - 10.** 2,6-lutidine (0.12 mL, 1 mmol) and TBSOTf (0.12 mL, 0.5 mmol) were added to a solution of **9** (140 mg, 0.25 mmol) in THF (2.5 mL) at 0 °C. After 12 hours at room temperature, the reaction was diluted with water (20 mL), extracted with ethyl acetate (3 x 20 mL). Organic phases were combined, washed with sat. brine (15 mL), dried over MgSO<sub>4</sub>, filtered, and concentrated *in vacuo*

to dryness. The crude product was purified by flash chromatography (0-50% ethyl acetate in hexane) to give the compound **10** (140 mg, 86%) as a white foam. <sup>1</sup>H NMR (400 MHz, Acetone-*d*<sub>6</sub>) δ 9.90 (s, 1H), 7.75 (d, 1H, *J* = 8.3 Hz), 5.53 (dt, 1H, *J* = 8.4, 1.2 Hz), 5.12 (d, 1H, *J* = 4.0 Hz), 4.68 (dd, 1H, *J* = 11.4, 1.3 Hz), 4.40 (d, 1H, *J* = 11.4 Hz), 4.02 (dd, 1H, *J* = 11.9, 2.7 Hz), 3.96 (dd, 1H, *J* = 10.2, 4.0 Hz), 3.84 (dd, 1H, *J* = 11.8, 1.9 Hz), 2.41-2.23 (m, 2H), 2.17-2.06 (m, 1H), 1.96 (s, 3H), 1.13-0.86 (m, 37H), 0.23 (s, 3H), 0.21 (s, 3H). <sup>13</sup>C NMR (101 MHz, Acetone-*d*<sub>6</sub>) δ 206.1, 170.7, 163.3, 152.2, 143.7, 101.7, 77.6, 73.3, 71.4, 65.3, 60.0, 42.4, 32.1, 26.5, 20.7, 19.0, 17.8, 17.7, 17.7, 17.7, 17.6, 17.3, 14.3, 14.1, 13.6, 13.5, -3.9, -4.1. HRMS-ESI (*m/z*) [M+H]<sup>+</sup> calcd. 671.3501. for C<sub>31</sub>H<sub>59</sub>N<sub>2</sub>O<sub>8</sub>Si<sub>3</sub>: found 671.3593.

**Synthesis of ((6*aR*,8*S*,9*S*,9*aR*)-9-((*tert*-butyldimethylsilyl)oxy)-8-(2,4-dioxo-3,4-dihydropyrimidin-1(2*H*)-yl)-2,2,4,4-tetraisopropylhexahydrocyclopenta[*f*][1,3,5]trioxocin-8-yl)methyl acetate - 14.** Ammonia gas was bubbled through a solution of compound **10** (0.43 g, 0.43 mmol) in methanol (13 mL) at 0 °C for 10 min. The reaction mixture was stirred at room temperature for 24 h, then concentrated in vacuo. The residue was purified by flash chromatography (0-50% ethyl acetate in hexane) to afford the desired compound **14** (0.37 g, 93%) as a white foam. <sup>1</sup>H NMR (400 MHz, Acetone-*d*<sub>6</sub>) δ 9.76 (s, 1H), 7.65 (d, 1H, *J* = 8.4 Hz), 5.53-5.45 (m, 1H), 5.06 (d, 1H, *J* = 4.2 Hz), 4.20 (dd, 1H, *J* = 11.4, 5.6 Hz), 4.13-3.98 (m, 2H), 3.93 (dd, 1H, *J* = 10.3, 4.3 Hz), 3.84 (dd, 1H, *J* = 11.8, 2.2 Hz), 3.73 (dd, 1H, *J* = 11.4, 6.1 Hz), 2.33-2.24 (m, 1H), 2.15 (d, 2H, *J* = 9.0 Hz), 1.16-0.88 (m, 37H), 0.21 (s, 3H), 0.18 (s, 3H). <sup>13</sup>C NMR (101 MHz, Acetone-*d*<sub>6</sub>) δ 163.6, 152.3, 144.8, 101.0, 77.5, 73.6, 63.1, 60.3, 42.8, 31.7, 26.6, 19.1, 17.8, 17.8, 17.7, 17.7, 17.6, 17.3, 14.3, 14.1, 13.6, 13.5, -3.1, -3.2. HRMS-ESI (*m/z*) [M+H]<sup>+</sup> calcd. 629.3395. for C<sub>29</sub>H<sub>57</sub>N<sub>2</sub>O<sub>7</sub>Si<sub>3</sub>: found 629.3485.

**Synthesis of 1-((6*aR*,8*S*,9*S*,9*aR*)-9-((*tert*-butyldimethylsilyl)oxy)-8-(hydroxymethyl)-2,2,4,4-tetraisopropylhexahydrocyclopenta[*f*][1,3,5]trioxocin-8-yl)pyrimidine-2,4(1*H*,3*H*)-dione - 16.** Under an argon atmosphere, Dess-Martin periodinane (0.88 g, 2.03 mmol) was added to a solution of compound **14** (1.03 g, 1.64 mmol) in dichloromethane (13 mL) and pyridine (1.06 mL, 13.1 mmol) at 0 °C. The reaction mixture was stirred at room temperature for 16 h, then diluted with dichloromethane (20 mL) and saturated NaHCO<sub>3</sub> (40 mL). The resulting precipitate was filtered off, and the aqueous layer was extracted with dichloromethane (5 × 30 mL). The combined

organic extracts were washed with saturated brine (50 mL), dried over anhydrous MgSO<sub>4</sub>, filtered, and concentrated in vacuo. The crude product was purified by flash chromatography (0-50% ethyl acetate in hexane) to obtain intermediate **15** (0.88 g), which was dissolved in pyridine (7.4 mL), before addition of NH<sub>2</sub>OH·HCl (0.42 g, 7.09 mmol). The reaction mixture was stirred at room temperature for 2 h, after which volatiles were removed in vacuo. The residue was dissolved in ethyl acetate (100 mL), washed with water (25 mL) and saturated brine (25 mL), dried over MgSO<sub>4</sub>, filtered, and concentrated in vacuo to dryness. The resulting crude product was used directly in the next step without further purification. The crude intermediate (0.9 g) was dissolved in Ac<sub>2</sub>O (12.6 mL), and NaOAc (0.7 g, 8.2 mmol) was added. The reaction mixture was heated at 130 °C for 2.5 h, then cooled to room temperature and quenched with saturated NaHCO<sub>3</sub> (200 mL) and stirred for 30 min. The aqueous layer was extracted with ethyl acetate (3 × 50 mL), and the combined organic extracts were washed with saturated NaHCO<sub>3</sub> (2 × 50 mL) and saturated brine (50 mL), dried over MgSO<sub>4</sub>, filtered, and concentrated in vacuo. The crude product was purified by flash chromatography (0-60% ethyl acetate in hexane) to afford the desired compound **16** (0.51 g, 53% over three steps) as a white foam. <sup>1</sup>H NMR (400 MHz, Acetone-*d*<sub>6</sub>) 7.89 (d, 1H, *J* = 8.4 Hz), 5.66 (d, 1H, *J* = 8.4 Hz), 4.77 (d, 1H, *J* = 3.6 Hz), 4.07 (ddd, 2H, *J* = 20.5, 11.3, 3.4 Hz), 3.97 (dd, 1H, *J* = 12.1, 1.9 Hz), 2.79 – 2.65 (m, 2H), 2.56 (tdd, 1H, *J* = 9.0, 3.4, 1.7 Hz), 1.19 – 0.88 (m, 37H), 0.29 (s, 3H), 0.21 (s, 3H). <sup>13</sup>C NMR (101 MHz, Acetone-*d*<sub>6</sub>) δ 162.8, 151.1, 140.8, 118.7, 103.0, 78.7, 72.4, 66.0, 60.1, 42.7, 34.9, 26.3, 18.8, 18.0, 17.8, 17.8, 17.7, 17.5, 17.5, 17.4, 17.3, 14.1, 14.1, 13.9, 13.5, -3.9, -3.9. HRMS-ESI (*m/z*) [M+H]<sup>+</sup> calcd. 624.3242. for C<sub>29</sub>H<sub>54</sub>N<sub>2</sub>O<sub>6</sub>Si<sub>3</sub>: found 624.3331.

**Synthesis of (6a*R*,8*S*,9*S*,9a*R*)-9-((*tert*-butyldimethylsilyl)oxy)-8-(2,4-dioxo-3,4-dihydropyrimidin-1(2*H*)-yl)-2,2,4,4-tetraisopropylhexahydrocyclopenta[*f*][1,3,5]trioxocine-8-carbonitrile – (Carba-CNU-1).** To a solution of compound **16** (0.61 g, 0.98 mmol) in THF (9.8 mL) was added TBAF (1 M in THF, 2.93 mL, 2.93 mmol) at 0 °C. The reaction mixture was stirred at room temperature for 12 h. Volatiles were removed in vacuo, and the residue was purified by flash chromatography (0-15% methanol in dichloromethane) to afford the desired compound **1** (0.21 g, 80%) as a white foam. <sup>1</sup>H NMR (400 MHz, Methanol-*d*<sub>4</sub>) δ 7.86 (d, 1H, *J* = 8.4 Hz), 5.62 (d, 1H, *J* = 8.3 Hz), 4.33 (d, 1H, *J* = 6.4 Hz), 3.93 (dd, 1H, *J* = 6.4, 3.6 Hz), 3.51 (m, 2H), 3.12 (dd, 1H, *J* = 14.0, 8.4 Hz), 2.24 (m, 1H), 1.74 (dd, 1H, *J* = 14.0, 9.6 Hz). <sup>13</sup>C NMR (101 MHz,

Methanol-*d*<sub>4</sub>)  $\delta$  165.7, 152.2, 142.9, 118.0, 102.8, 77.5, 72.3, 67.0, 63.2, 46.8, 36.7. HRMS-ESI (*m/z*) [M+H]<sup>+</sup> calcd. 268.0855. for C<sub>11</sub>H<sub>13</sub>N<sub>3</sub>O<sub>5</sub>: found 268.0929.

**Synthesis of (1*R*,2*S*,3*S*,5*R*)-5-(acetoxymethyl)-3-cyano-3-(2,4-dioxo-3,4-dihydropyrimidin-1(2*H*)-yl)cyclopentane-1,2-diyl diacetate - 17.** To a suspension of Carba-CNU-1 (0.21 g, 0.79 mmol) in anhydrous pyridine (7.8 mL) were added DMAP (19.1 mg, 0.15 mmol) and Ac<sub>2</sub>O (0.3 mL, 3.1 mmol) at 0 °C. The reaction mixture was stirred at room temperature for 8 h. Volatiles were removed in vacuo, and the residue was diluted with ethyl acetate (150 mL), washed with saturated NaHCO<sub>3</sub> (40 mL) and saturated brine (30 mL). The organic layer was dried over anhydrous MgSO<sub>4</sub>, filtered, and concentrated in vacuo to dryness. The crude product was purified by flash chromatography (0-60% ethyl acetate in hexane) to afford the compound **17** as a white foam. (0.24 g, 75%). <sup>1</sup>H NMR (400 MHz, Acetone-*d*<sub>6</sub>)  $\delta$  7.57 (d, 1H, *J* = 8.0 Hz), 5.82 (d, 1H, *J* = 6.8 Hz), 5.67 (d, 1H, *J* = 8.0 Hz), 5.34 (t, 1H, *J* = 6.4 Hz), 4.31-4.18 (m, 2H), 3.20 (dd, 1H, *J* = 14.0, 8.4 Hz), 2.84-2.74 (m, 1H), 2.45 (dd, 1H, *J* = 14.0, 10.4 Hz), 2.13 (s, 3H), 2.08 (s, 3H), 2.01 (s, 3H). <sup>13</sup>C NMR (101 MHz, Acetone-*d*<sub>6</sub>)  $\delta$  170.8, 170.2, 169.7, 162.8, 151.1, 141.0, 116.4, 103.3, 74.7, 71.5, 65.8, 64.1, 41.4, 36.1, 20.8, 20.6, 20.5. HRMS-ESI (*m/z*) [M+H]<sup>+</sup> calcd. 394.1172. for C<sub>17</sub>H<sub>20</sub>N<sub>3</sub>O<sub>8</sub>: found 394.1246.

**Synthesis of (1*S*,2*S*,3*R*,4*R*)-1-(4-amino-2-oxopyrimidin-1(2*H*)-yl)-2,3-dihydroxy-4-(hydroxymethyl)cyclopentane-1-carbonitrile – (Carba-CNC-3):** To a solution of 1,2,4-triazole (1.20 g, 17.3 mmol) in acetonitrile (33 mL) were added Et<sub>3</sub>N (2.6 mL, 18.7 mmol) and POCl<sub>3</sub> (0.27 mL, 2.91 mmol) at 0 °C. The reaction mixture was stirred at 0 °C for 3 h. Then, a solution of compound **17** (0.22 g, 0.56 mmol) in acetonitrile (7 mL) was added dropwise at 0 °C, and the mixture was stirred overnight at room temperature. The reaction mixture was diluted with ethyl acetate (50 mL), filtered, and the filtrate was washed with saturated NaHCO<sub>3</sub> (10 mL) and saturated brine (10 mL). The organic layer was dried over anhydrous MgSO<sub>4</sub>, filtered, and concentrated under reduced pressure to dryness. The crude product was purified by quick flash chromatography (0-100% ethyl acetate in hexane) to afford the triazole intermediate **18** as a white solid (0.17 g). This material (0.09 g, 0.2 mmol) was dissolved in 1,4-dioxane (6 mL), and ammonia gas was bubbled at 5 °C for 10 min. The reaction mixture was then stirred at ambient temperature until complete consumption of the starting material, as monitored by TLC and LCMS (approximately

2 h). The solvent was removed under reduced pressure, and the crude product was purified by flash chromatography (0-10% methanol/dichloromethane) to afford the intermediate **18** as a white solid (0.05 g). To a solution of this intermediate (0.05 g, 0.14 mmol) in methanol (1.8 mL) was added NH<sub>4</sub>OH (1.8 mL) at 0 °C. The reaction was maintained at the same temperature for 6 h, and then the solvents were evaporated. The residue was washed methanol (2 × 2 mL) to afford the desired compound Carba-CNC-**3** (34 mg, 63% over three steps) as a white solid. <sup>1</sup>H NMR (400 MHz, D<sub>2</sub>O) δ 7.79 (d, 1H, *J* = 7.8 Hz), 6.01 (d, 1H, *J* = 7.7 Hz), 4.53 (d, 1H, *J* = 6.3 Hz), 4.08 (dd, 1H, *J* = 6.3, 4.5 Hz), 3.63 (d, 2H, *J* = 5.8 Hz), 3.15 (dd, 1H, *J* = 14.2, 8.6 Hz), 2.39 (td, 1H, *J* = 9.2, 4.4 Hz), 1.83 (dd, 1H, *J* = 14.2, 9.7 Hz). <sup>13</sup>C NMR (101 MHz, D<sub>2</sub>O) δ 165.9, 157.4, 142.0, 117.8, 96.3, 75.3, 71.1, 65.6, 61.9, 44.2, 34.9. HRMS-ESI (*m/z*) [M+H]<sup>+</sup> calcd. 266.1015. for C<sub>11</sub>H<sub>15</sub>N<sub>4</sub>O<sub>4</sub>: found 267.1086.

**Synthesis of isopropyl (((((1R,2R,3S,4S)-4-cyano-4-(2,4-dioxo-3,4-dihydropyrimidin-1(2H)-yl)-2,3-dihydroxycyclopentyl)methoxy)(phenoxy)phosphoryl)-L-alaninate - 2.**

To a solution of Carba-CNU - **1** (40.5 mg, 0.15 mmol) in anhydrous THF (2.5 mL) and anhydrous DMF (1.5 mL) containing 4 Å molecular sieves, <sup>t</sup>BuMgCl (1.0 M in THF, 0.3 mL, 0.30 mmol) was added dropwise at -10 °C and the reaction mixture was stirred for 30 min. A solution of isopropyl ((R)-(perfluorophenoxy)(phenoxy)phosphoryl)-L-alaninate (Reagent A, 66.2 mg, 0.14 mmol) in THF (0.6 mL) was then added dropwise at -10 °C. The reaction mixture was stirred overnight at 0 °C, then diluted with saturated NaHCO<sub>3</sub> (25 mL) and extracted with ethyl acetate (3 × 20 mL). The combined organic layers were washed with saturated brine (20 mL), dried over anhydrous MgSO<sub>4</sub>, filtered, and concentrated *in vacuo* to dryness. The crude product was purified by flash chromatography (0-10% methanol/dichloromethane) to afford the desired compound **2** (23.4 mg, 29%) as a white foam. <sup>1</sup>H NMR (400 MHz, Methanol -*d*<sub>4</sub>) δ 7.90 (d, 1H, *J* = 8.4 Hz), 7.34 (t, 2H, *J* = 8.0 Hz), 7.22-7.15 (m, 3H), 5.73 (d, 1H, *J* = 8.4 Hz), 4.95 (hept, 1H, *J* = 6.0 Hz), 4.29 (d, 1H, *J* = 6.4 Hz), 4.24-4.19 (m, 1H), 4.14-4.09 (m, 1H), 4.08-4.05 (m, 1H), 3.21 (dd, 1H, *J* = 14.0, 8.4 Hz), 2.49-2.46 (m, 1H), 1.72 (dd, 1H, *J* = 14.0, 10.0 Hz), 1.33 (d, *J* = 6.8 Hz, 3H), 1.22 (dd, *J* = 6.4, 4.8 Hz, 6H). <sup>13</sup>C NMR (101 MHz, Methanol -*d*<sub>4</sub>) δ 174.4 (d, *J* = 4.0 Hz), 165.6, 152.2, 151.1 (d, *J* = 2.0 Hz), 142.8, 130.8, 126.2, 121.4 (d, *J* = 4.0 Hz), 117.7, 103.0, 77.3, 71.6, 70.1, 67.9 (d, *J* = 6.0 Hz), 66.7, 51.6, 45.2 (d, *J* = 8.0 Hz), 36.0, 21.8 (d, *J* = 10.1 Hz), 21.4 (d, *J*

= 7.0 Hz).  $^{31}\text{P}$  NMR (162 MHz, Methanol  $-d_4$ )  $\delta$  3.53. HRMS-ESI ( $m/z$ )  $[\text{M}+\text{H}]^+$  calcd. 537.1372. for  $\text{C}_{23}\text{H}_{30}\text{N}_4\text{O}_9\text{P}$ : found 537.1756.

**Synthesis of isopropyl (((((1R,2R,3S,4S)-4-(4-amino-2-oxopyrimidin-1(2H)-yl)-4-cyano-2,3-dihydroxycyclopentyl)methoxy)(phenoxy)phosphoryl)-L-alaninate - 4.**

To a solution of compound **3** (34 mg, 0.12 mmol) in anhydrous DMF (1.5 mL) containing 4 Å molecular sieves,  $t\text{BuMgCl}$  (1.0 M in THF, 0.26 mL, 0.26 mmol) was added dropwise at  $-10\text{ }^\circ\text{C}$ , and the reaction mixture was stirred for 30 min. A solution of isopropyl ((R)-(perfluorophenoxy)(phenoxy)phosphoryl)-L-alaninate (Reagent A, 55 mg, 0.11 mmol) in THF (0.5 mL) was then added dropwise at  $-10\text{ }^\circ\text{C}$ . The mixture was stirred overnight at  $0\text{ }^\circ\text{C}$ , diluted with saturated  $\text{NaHCO}_3$  (25 mL), and extracted with ethyl acetate ( $3 \times 20\text{ mL}$ ). The combined organic layers were washed with saturated brine (20 mL), dried over anhydrous  $\text{MgSO}_4$ , filtered, and concentrated *in vacuo* to dryness. The crude product was purified by flash chromatography (0-10% methanol/dichloromethane) to afford the title compound **4** (8.4 mg, 13%) as a white foam.  $^1\text{H}$  NMR (400 MHz, Methanol  $-d_4$ )  $\delta$  7.87 (d, 1H,  $J = 7.7\text{ Hz}$ ), 7.35 (t, 2H,  $J = 7.9\text{ Hz}$ ), 7.26-7.14 (m, 3H), 5.94 (d, 1H,  $J = 7.7\text{ Hz}$ ), 4.99-4.91 (m, 1H), 4.29 (d, 1H,  $J = 6.7\text{ Hz}$ ), 4.29-4.20 (m, 1H), 4.14 (ddd, 1H,  $J = 10.4, 6.0, 4.3\text{ Hz}$ ), 4.08 (dd, 1H,  $J = 6.7, 4.2\text{ Hz}$ ), 3.89 (dq, 1H,  $J = 9.5, 7.1\text{ Hz}$ ), 3.24 (dd, 1H,  $J = 13.9, 8.5\text{ Hz}$ ), 2.56-2.46 (m, 1H), 1.72 (dd, 1H,  $J = 14.0, 10.4\text{ Hz}$ ), 1.35 (dd, 3H  $J = 7.2, 1.1\text{ Hz}$ ), 1.24 (dd, 6H  $J = 6.3, 2.5\text{ Hz}$ ).  $^{13}\text{C}$  NMR (101 MHz, Methanol  $-d_4$ )  $\delta$  174.4 (d,  $J = 4.5\text{ Hz}$ ), 167.4, 158.0, 152.1, 143.4, 130.8, 126.2, 121.4 (d,  $J = 4.7\text{ Hz}$ ), 118.1, 77.2, 71.7, 70.1, 67.9 (d,  $J = 5.6\text{ Hz}$ ), 67.4, 51.6, 45.2 (d,  $J = 7.7\text{ Hz}$ ), 35.9, 21.9 (d,  $J = 11.2\text{ Hz}$ ), 20.4 (d,  $J = 7.3\text{ Hz}$ ).  $^{31}\text{P}$  NMR (162 MHz, Methanol  $-d_4$ )  $\delta$  3.52. HRMS-ESI ( $m/z$ )  $[\text{M}+\text{H}]^+$  calcd. 536.1832. for  $\text{C}_{23}\text{H}_{31}\text{N}_5\text{O}_8\text{P}$ : found 536.1912.

NMR Spectral data of compound-7:

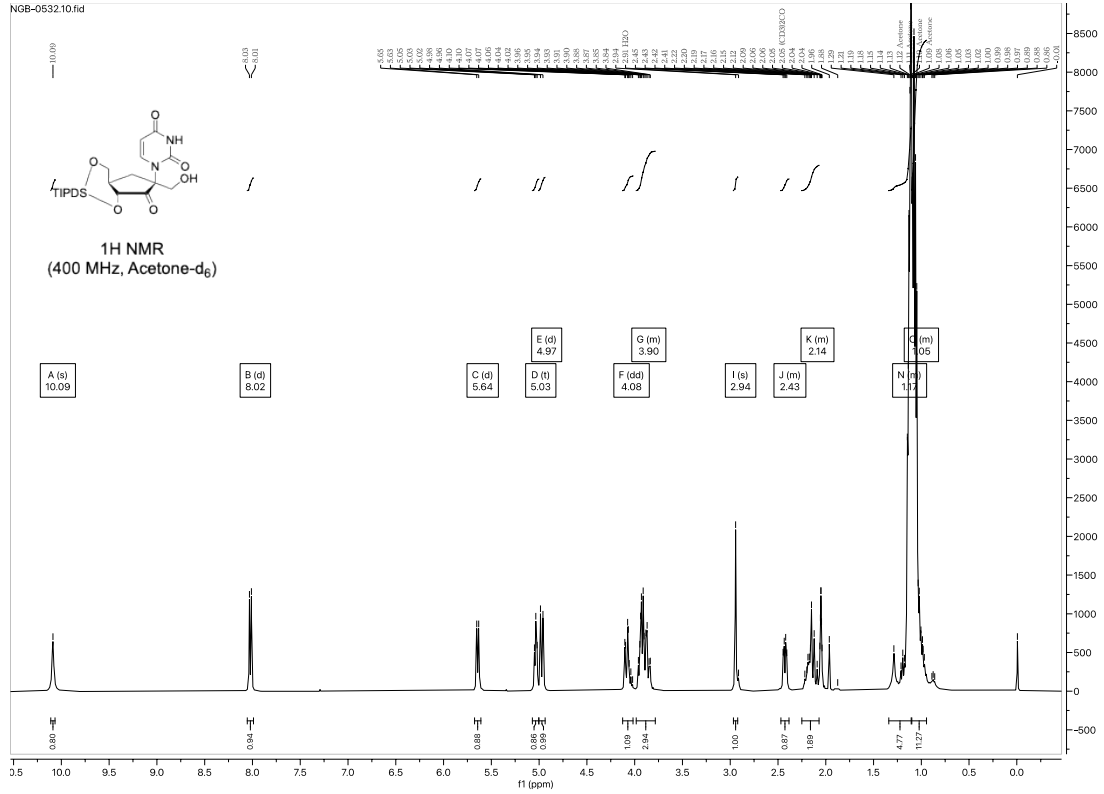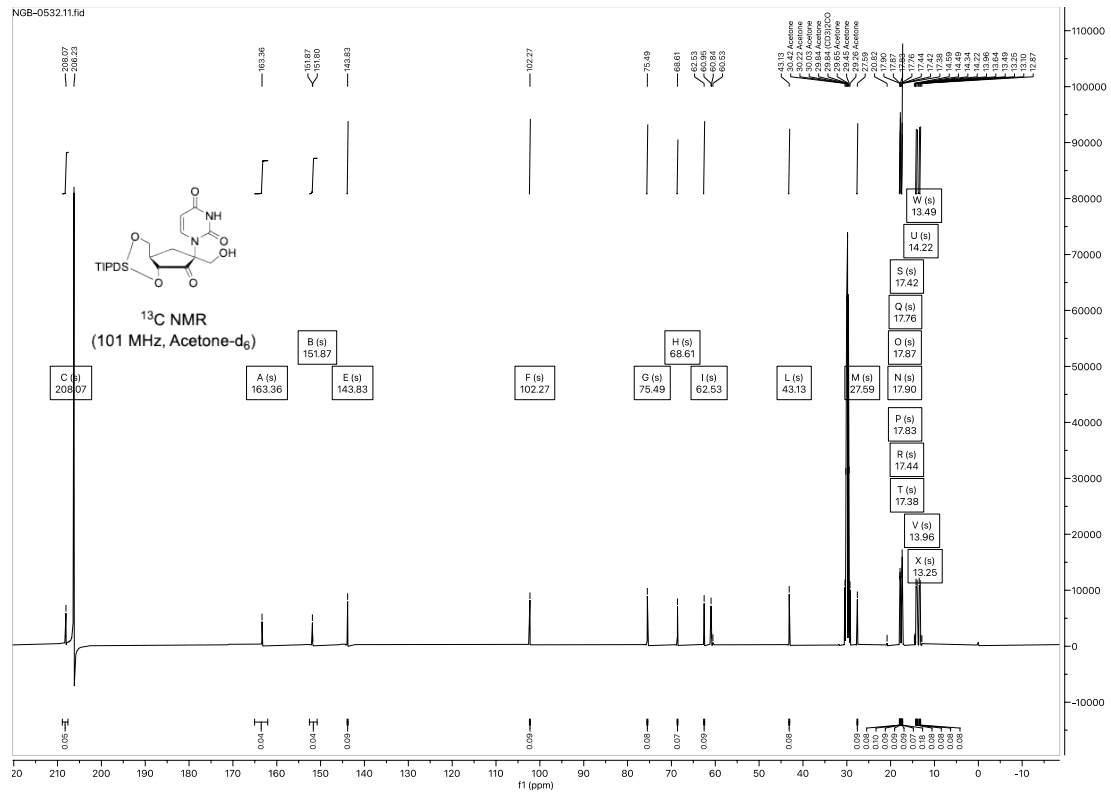

NMR Spectral data of compound-8:

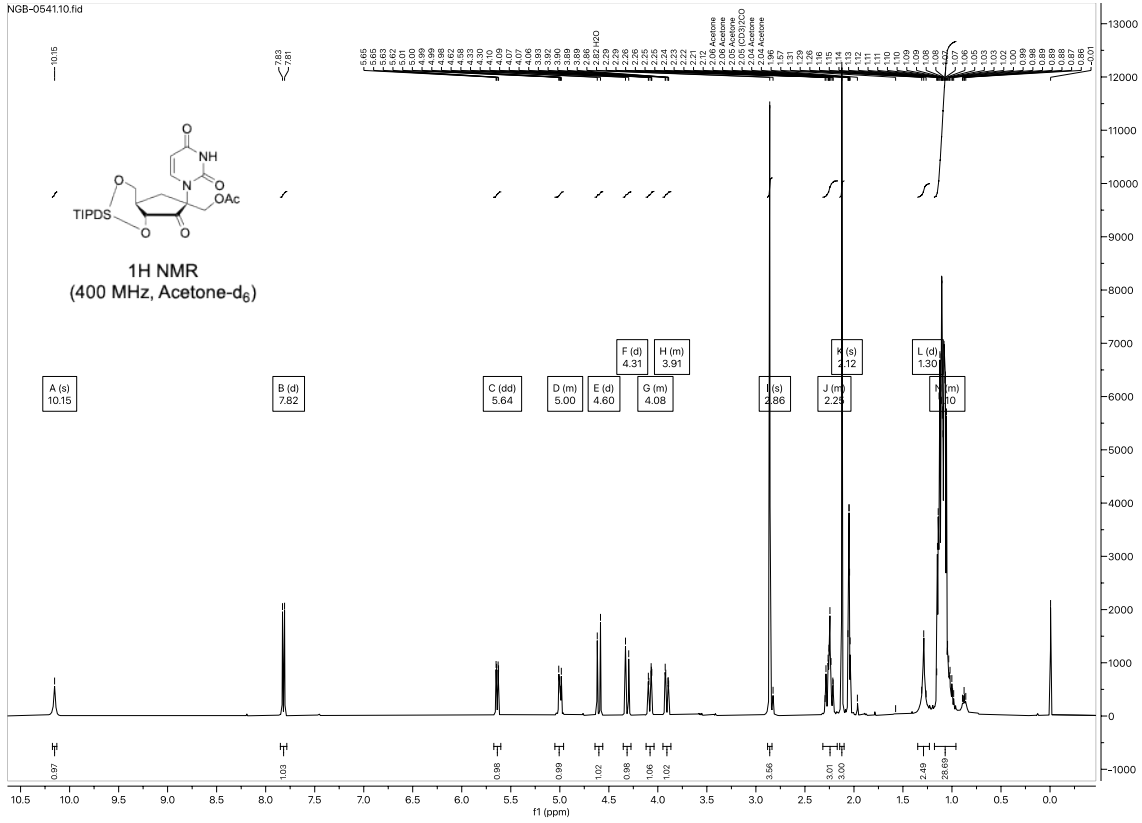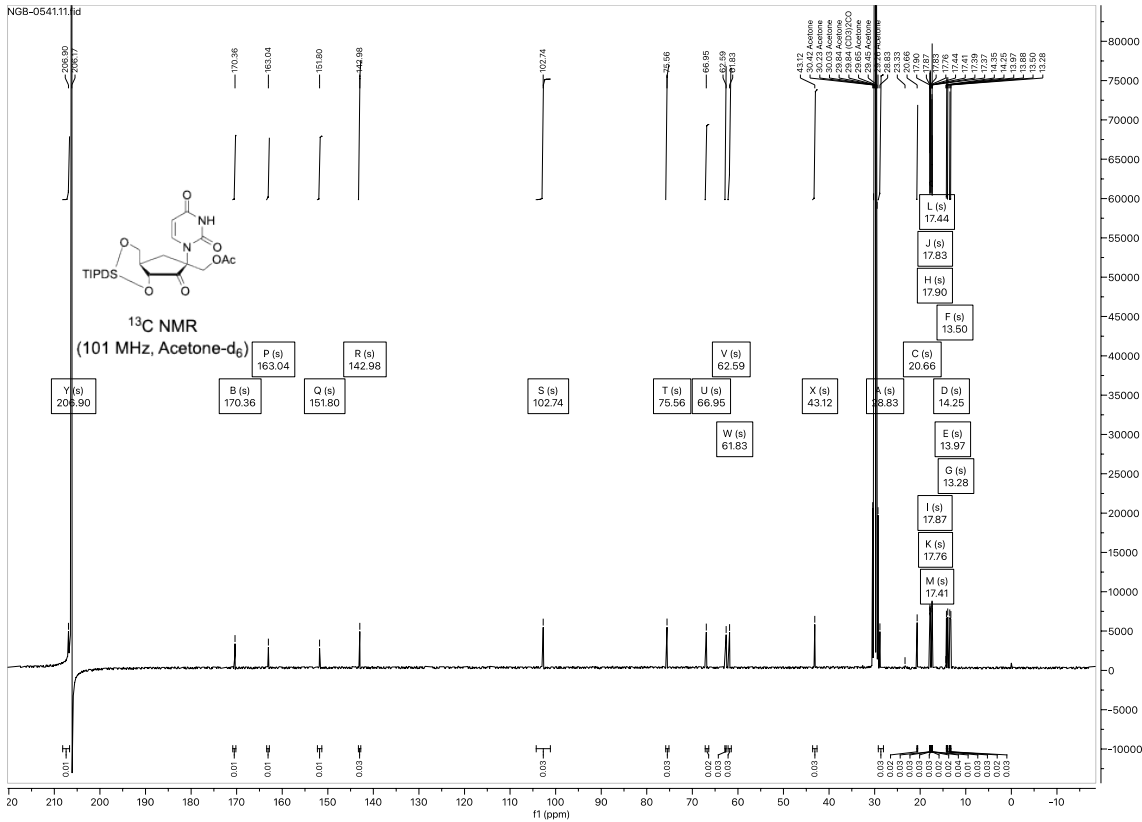



NMR Spectral data of compound-10:

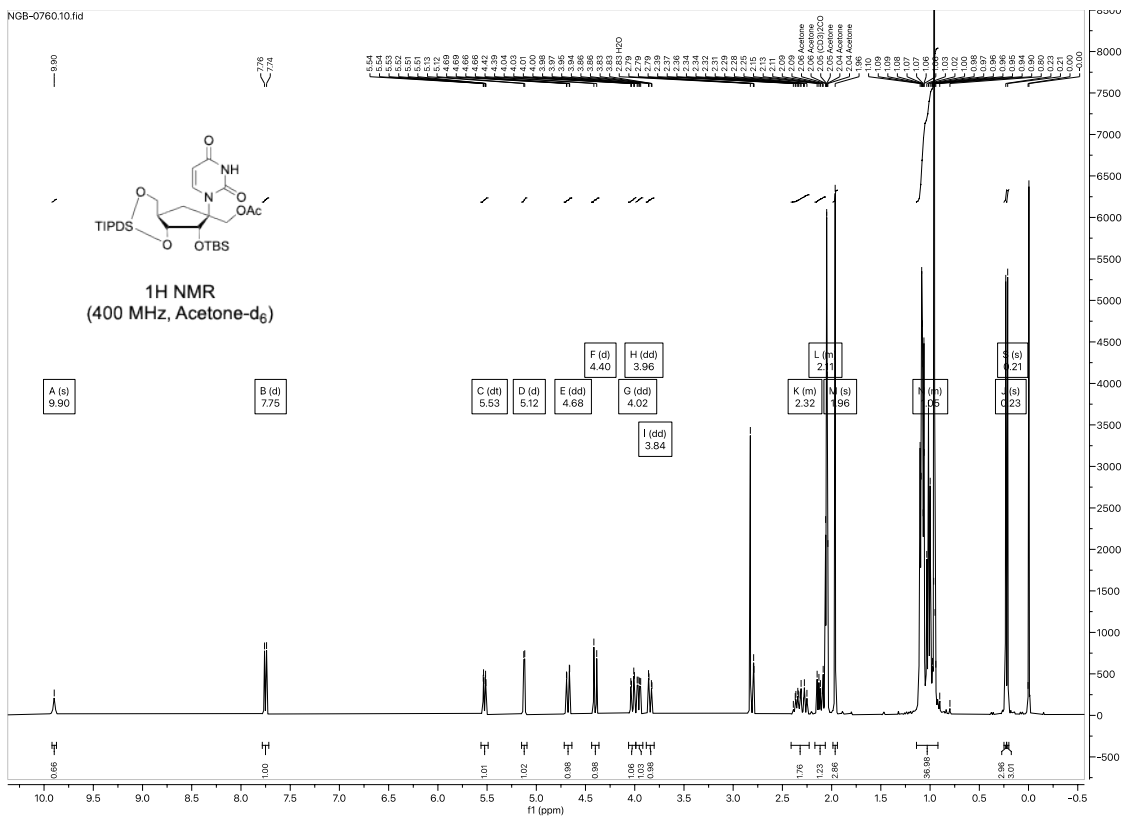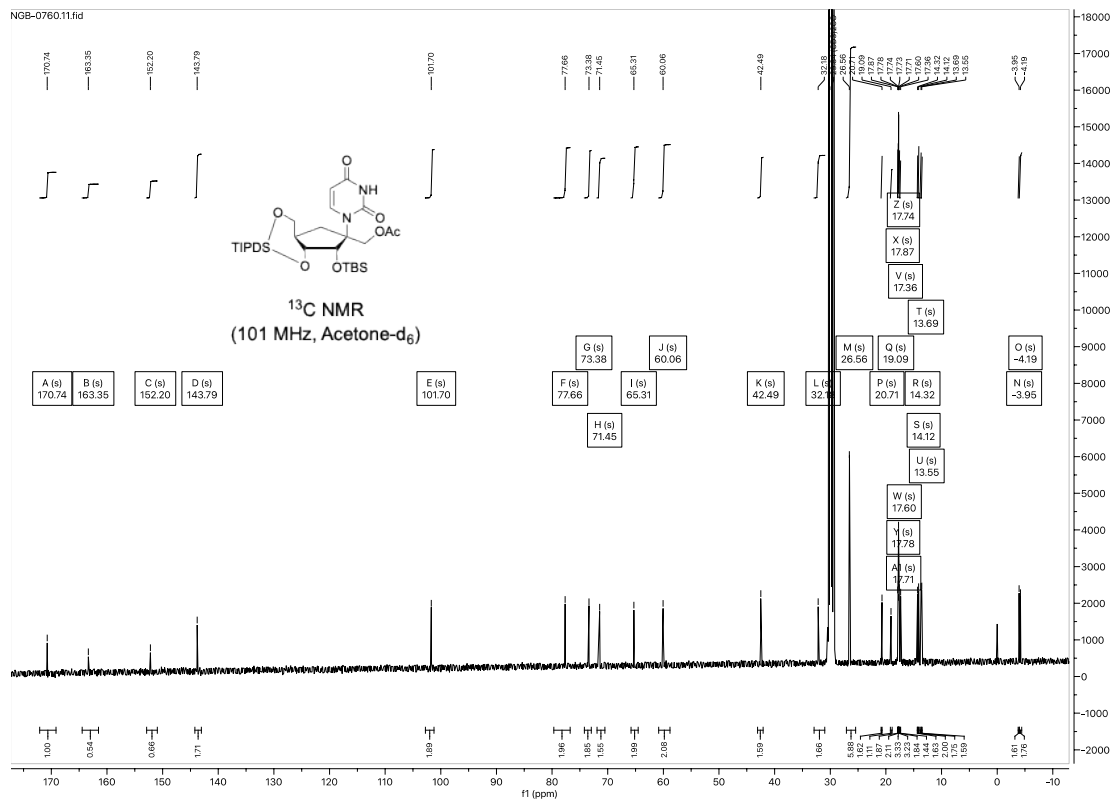

COSY spectrum of compound - 10

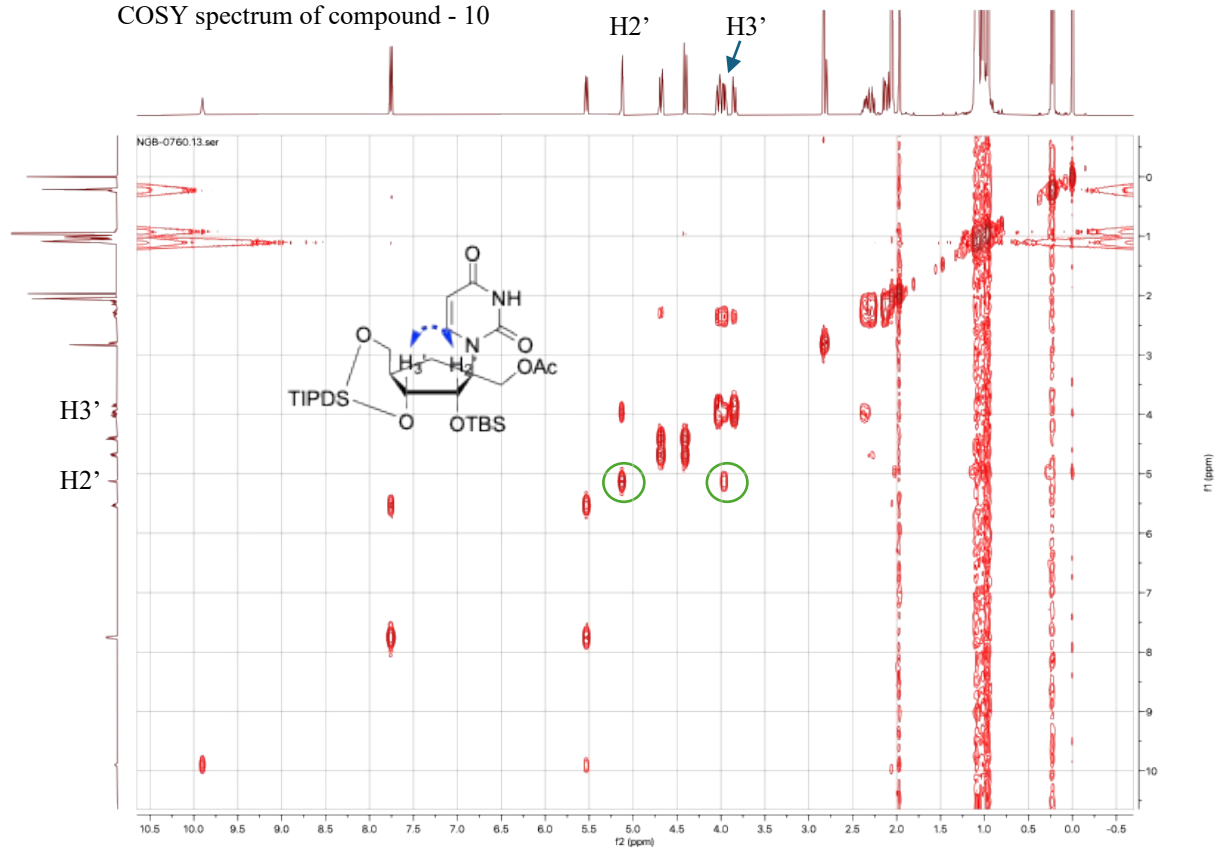

NOESY spectrum of compound - 10

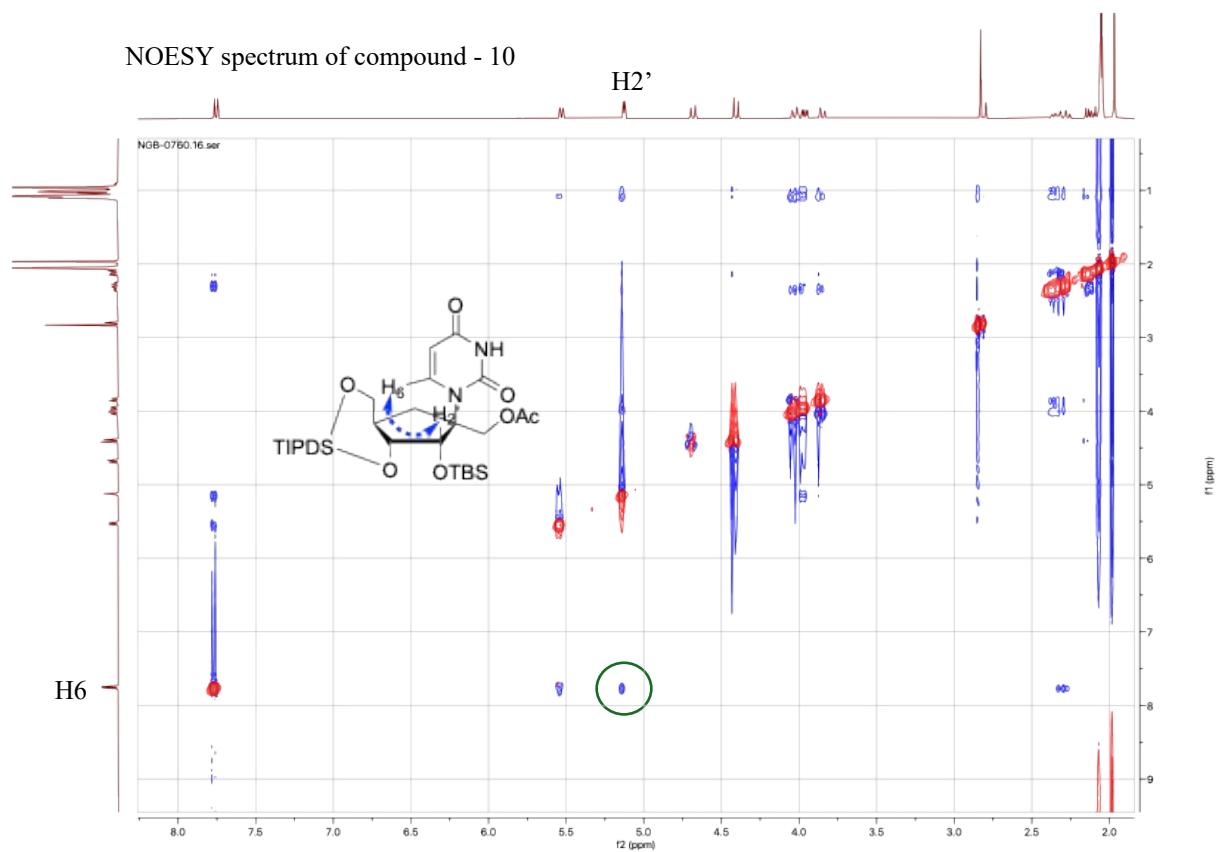

NMR Spectral data of compound-14:

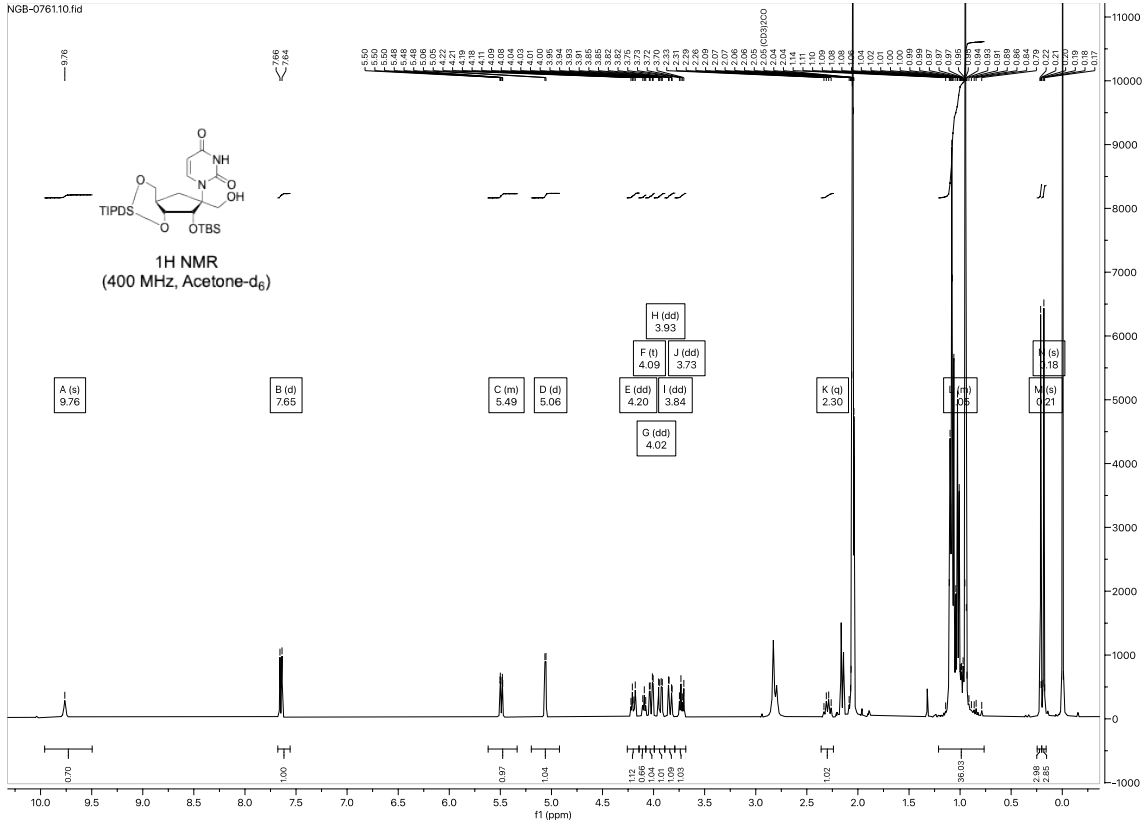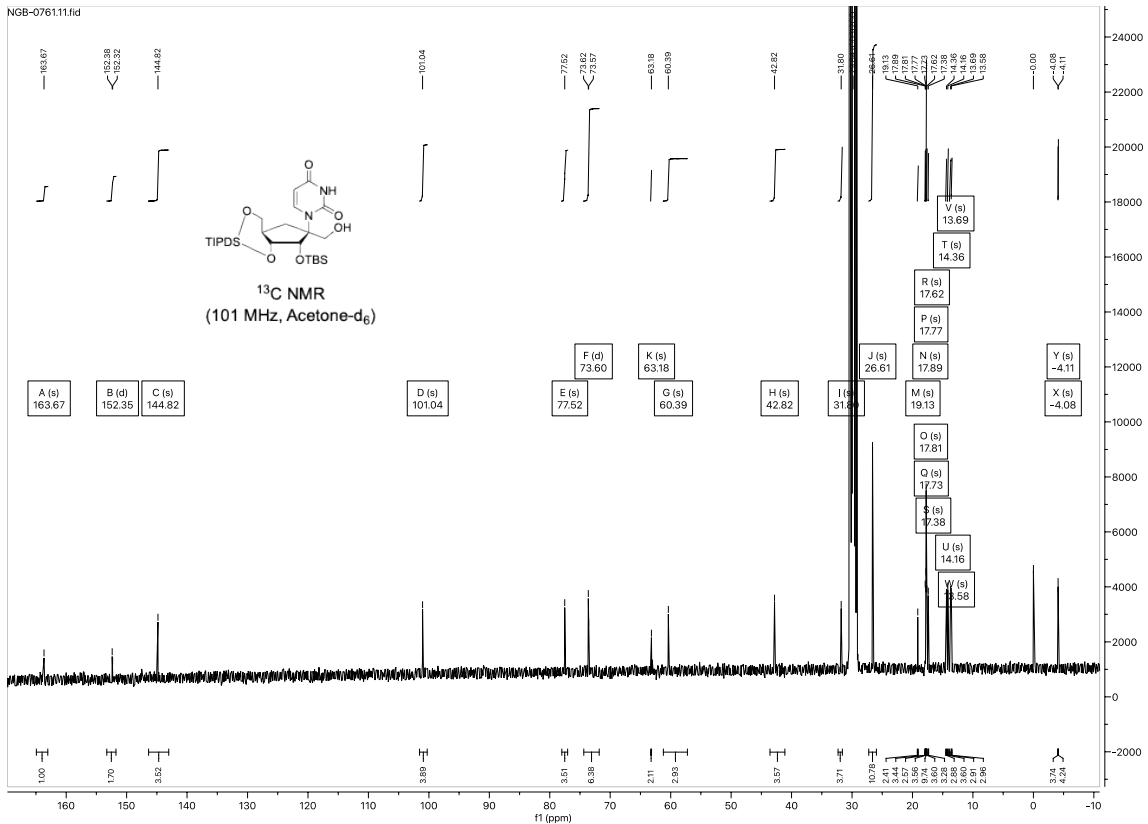

NMR Spectral data of compound-16:

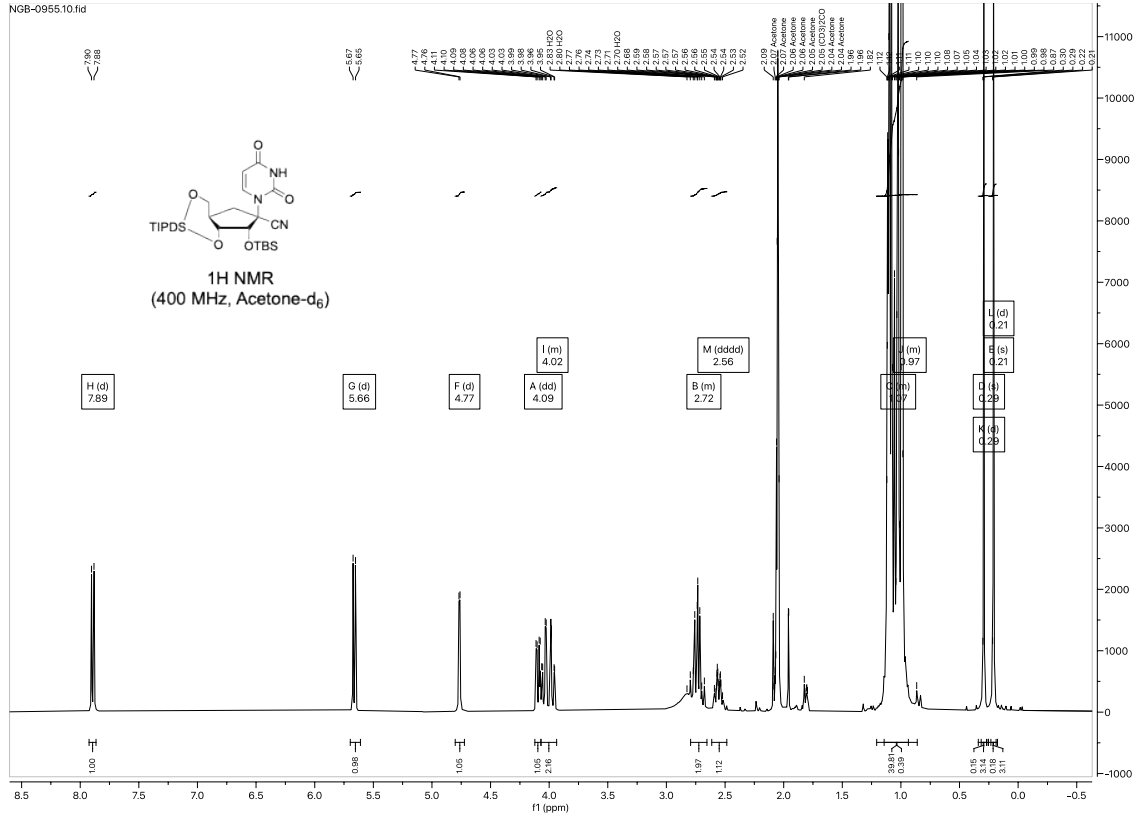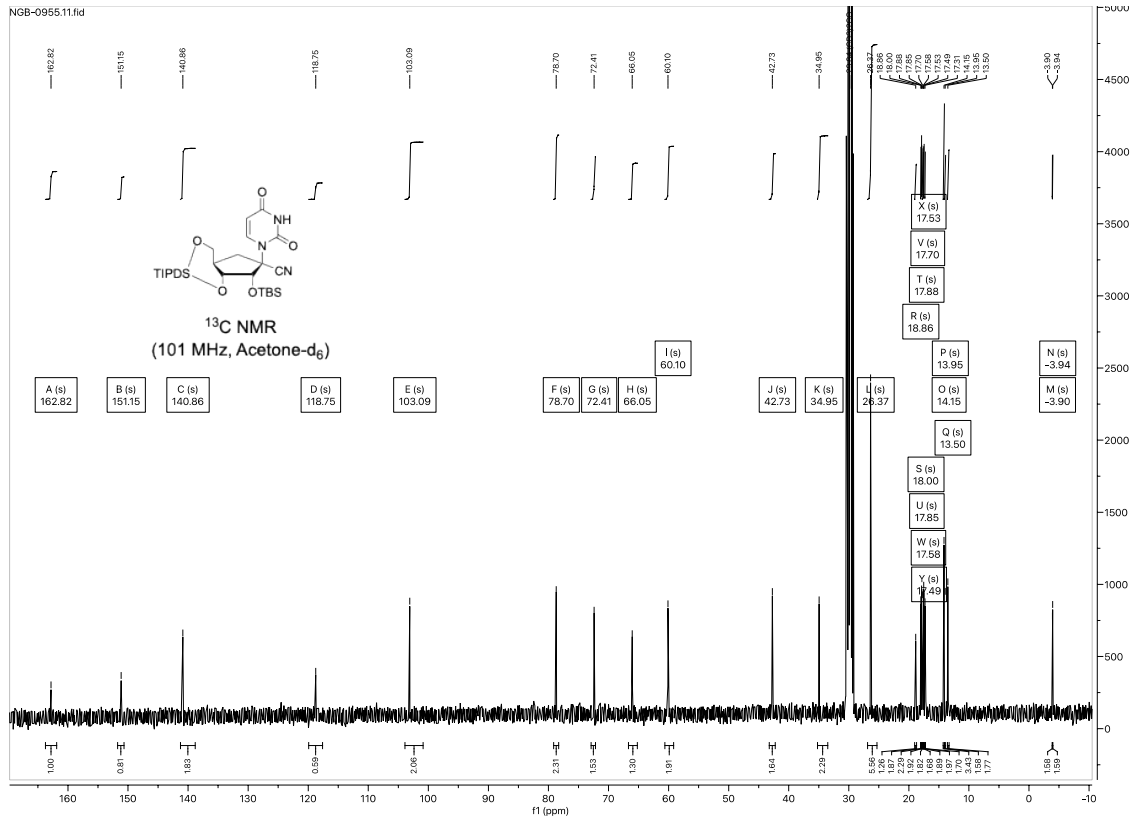

NMR Spectral data of Carba-CNU-1:

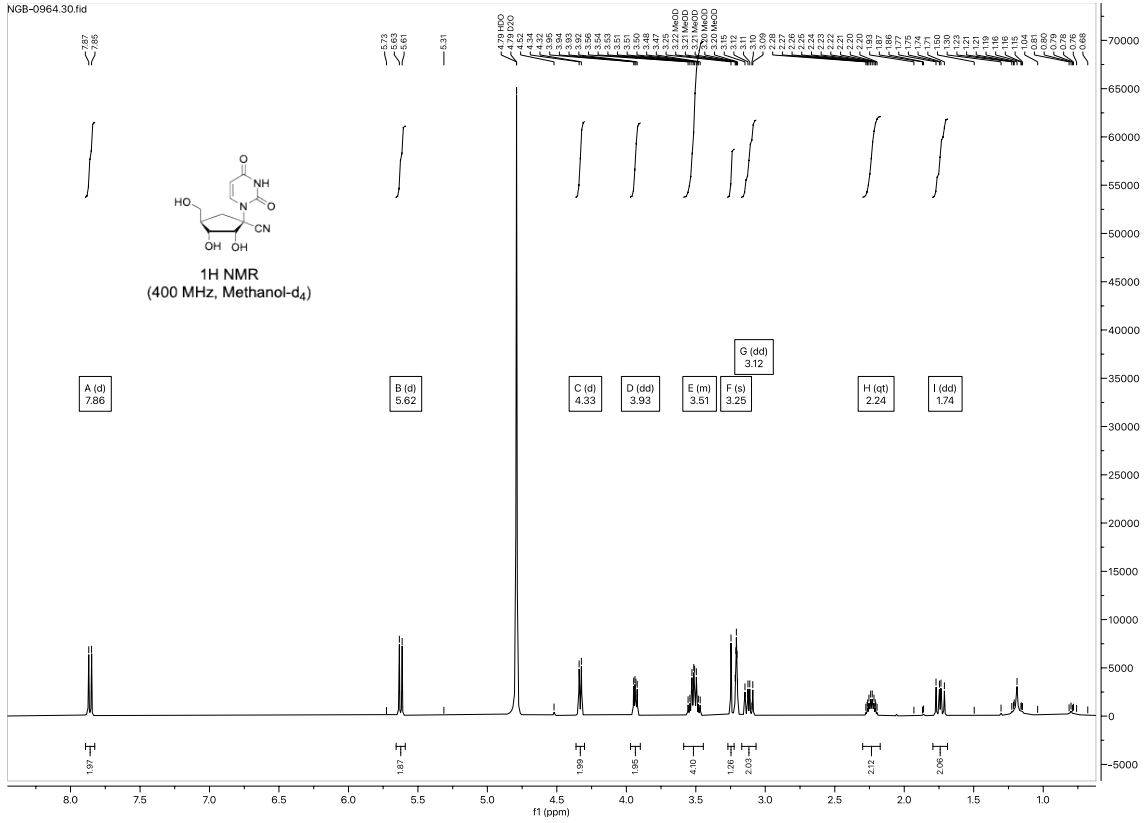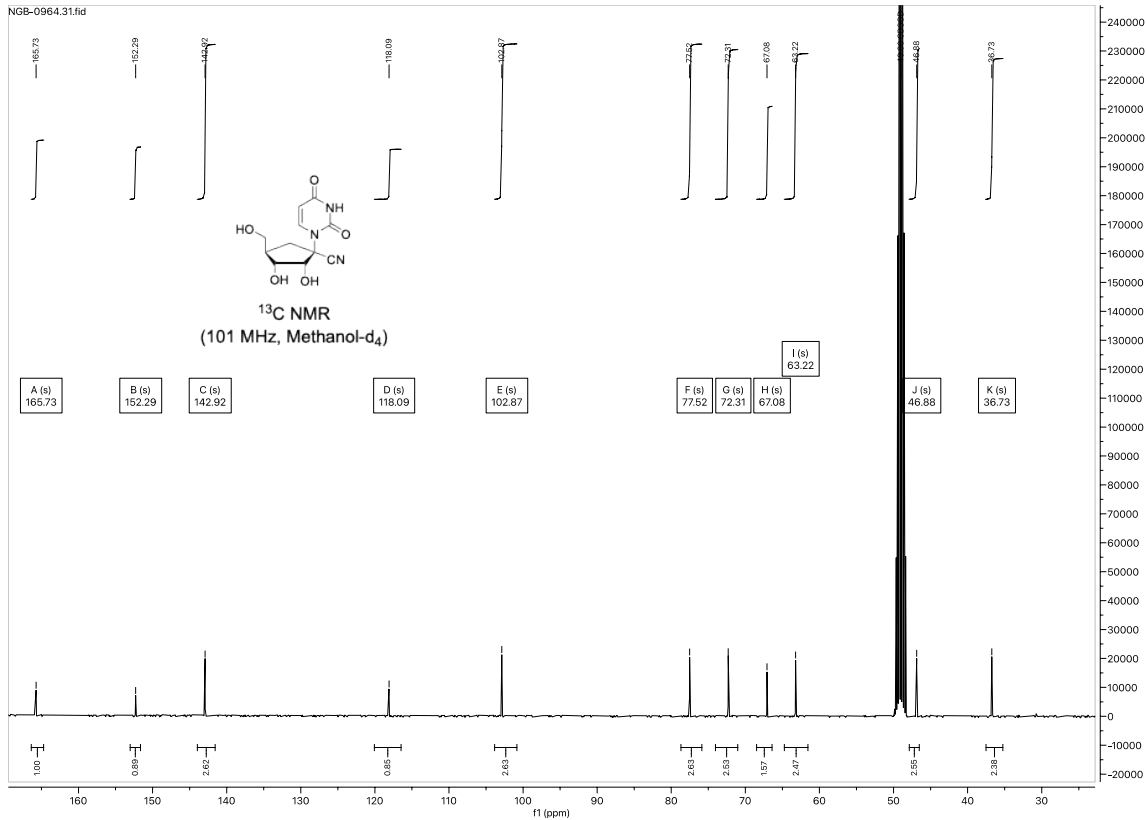



NMR Spectral data of Carba-CNC-3:

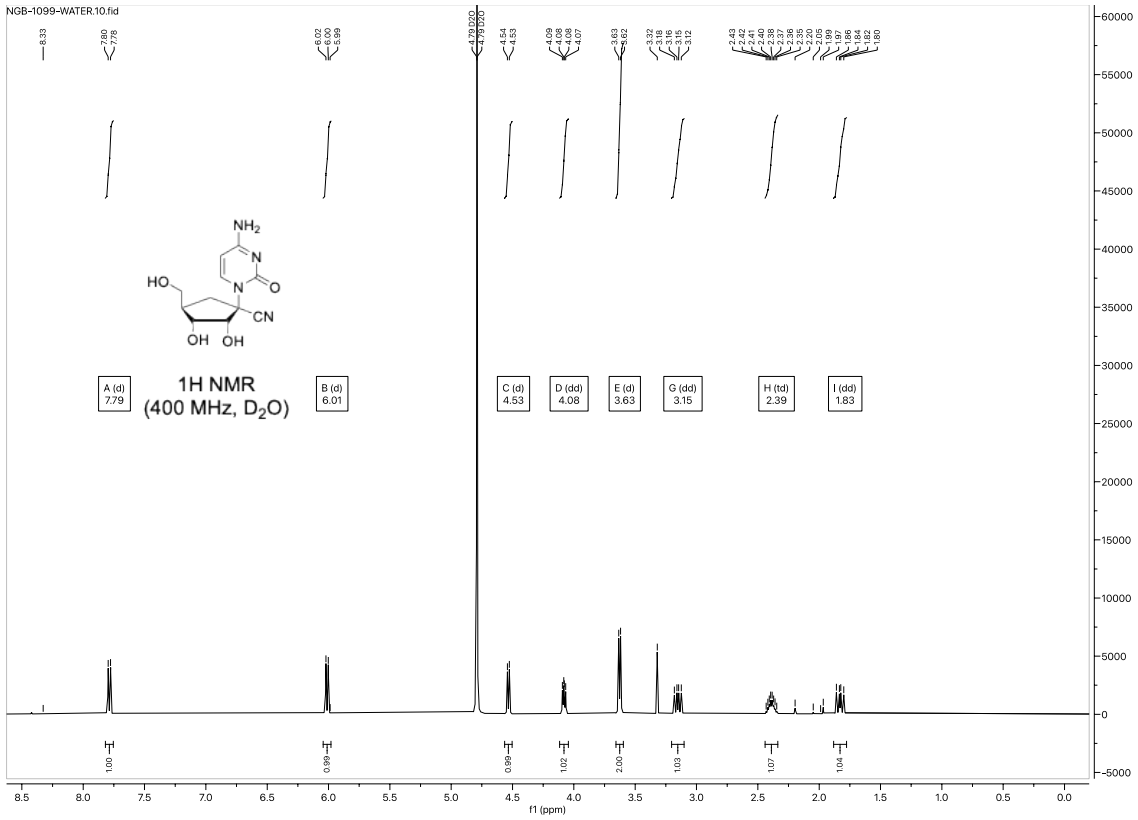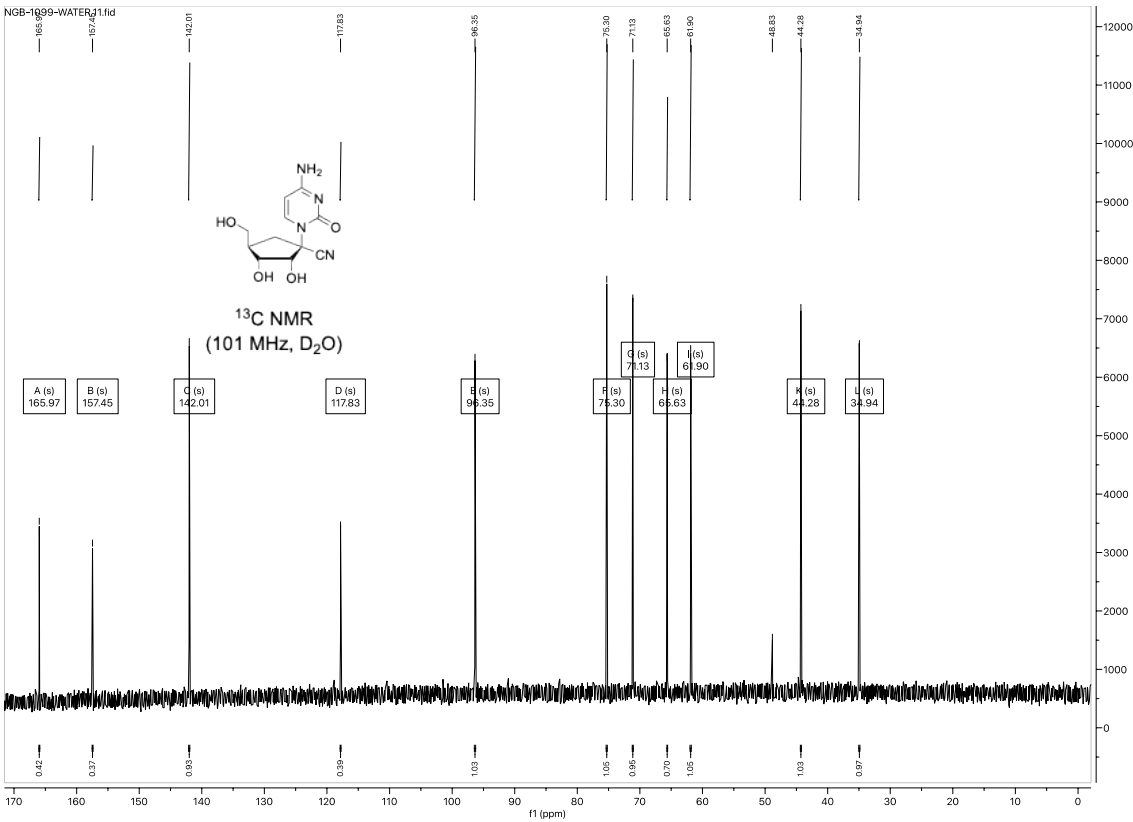

NMR Spectral data of compound-2:

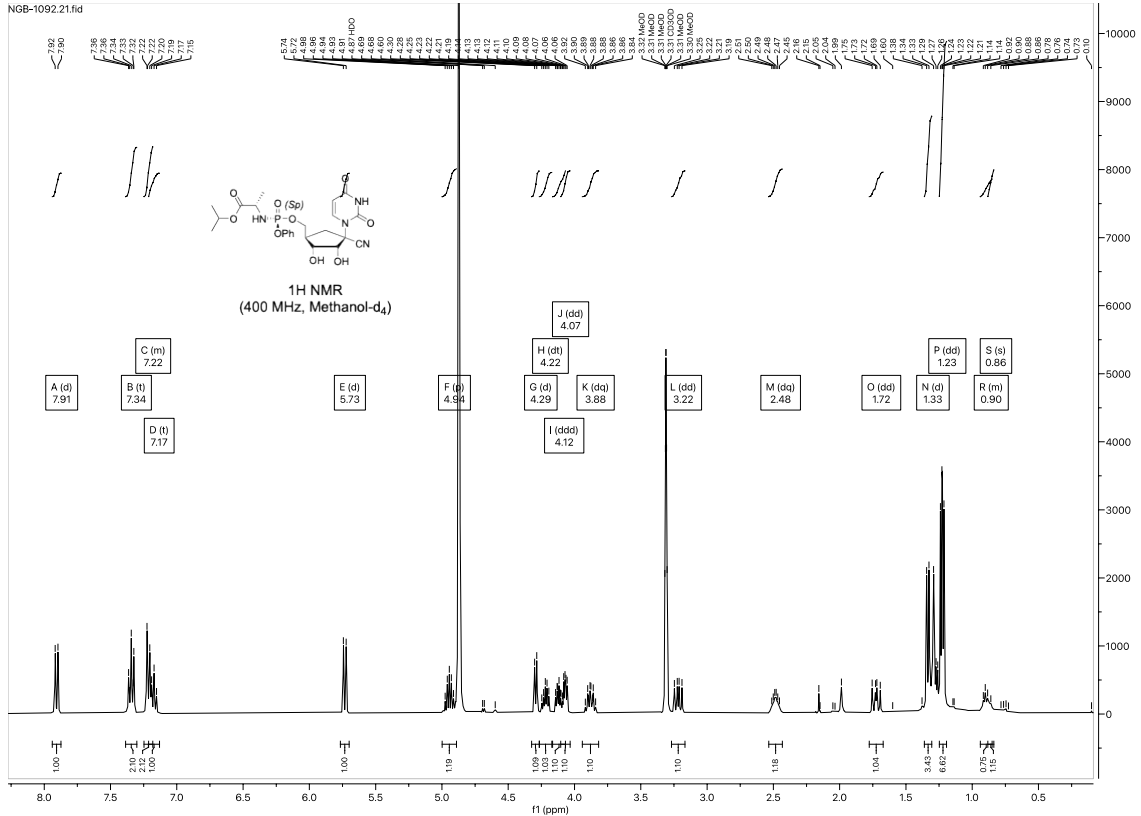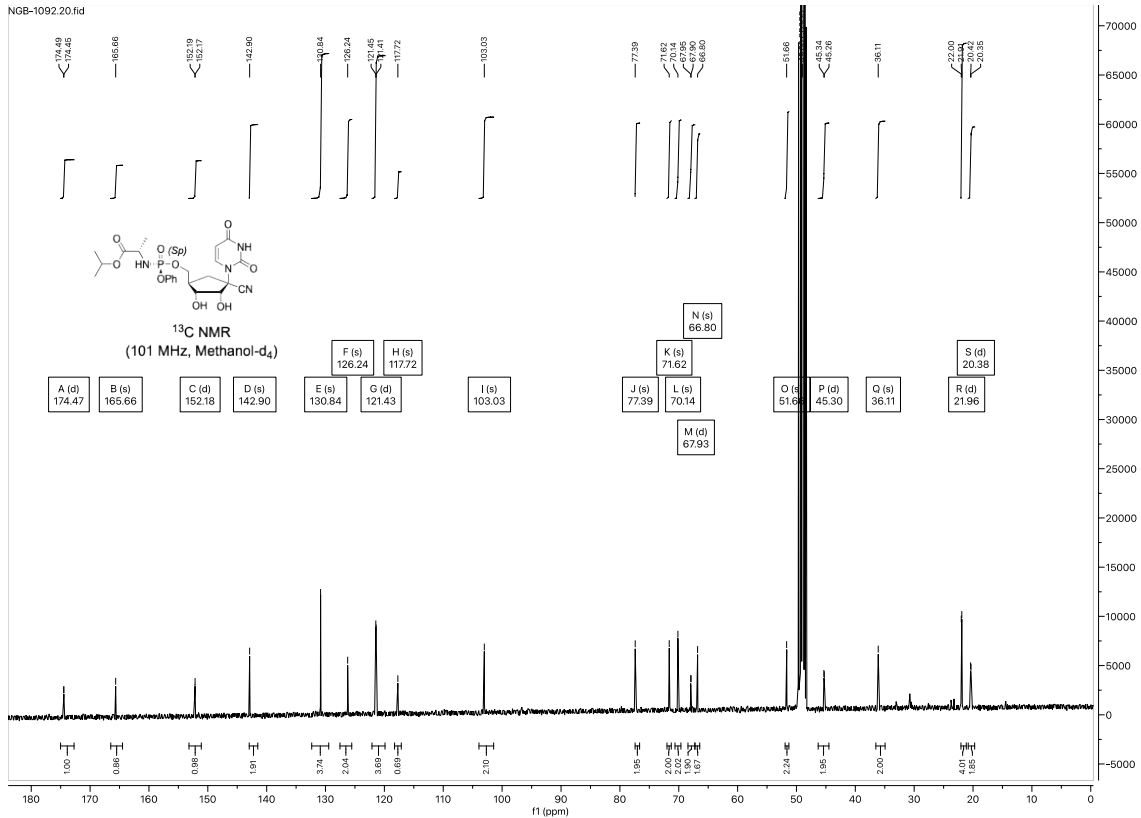

NGB-1092.11.fid

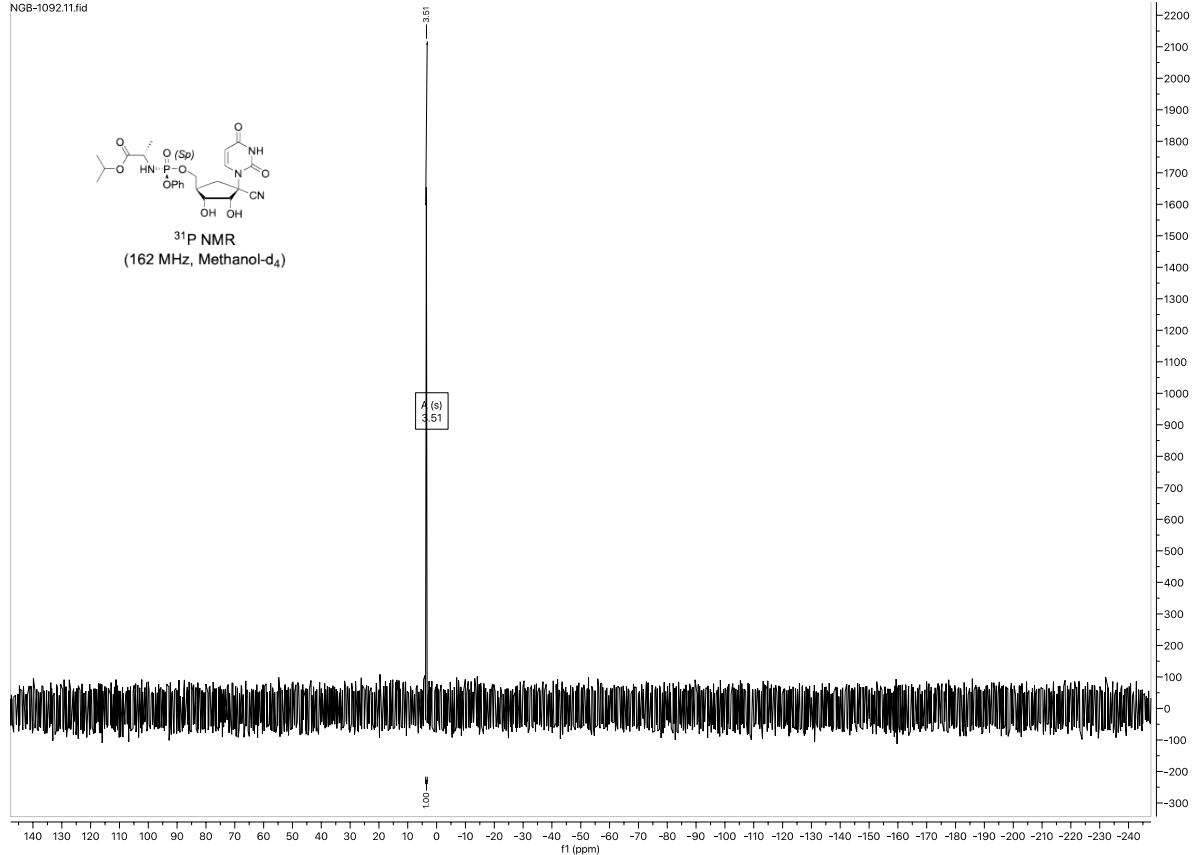

# NMR Spectral data of compound-4:

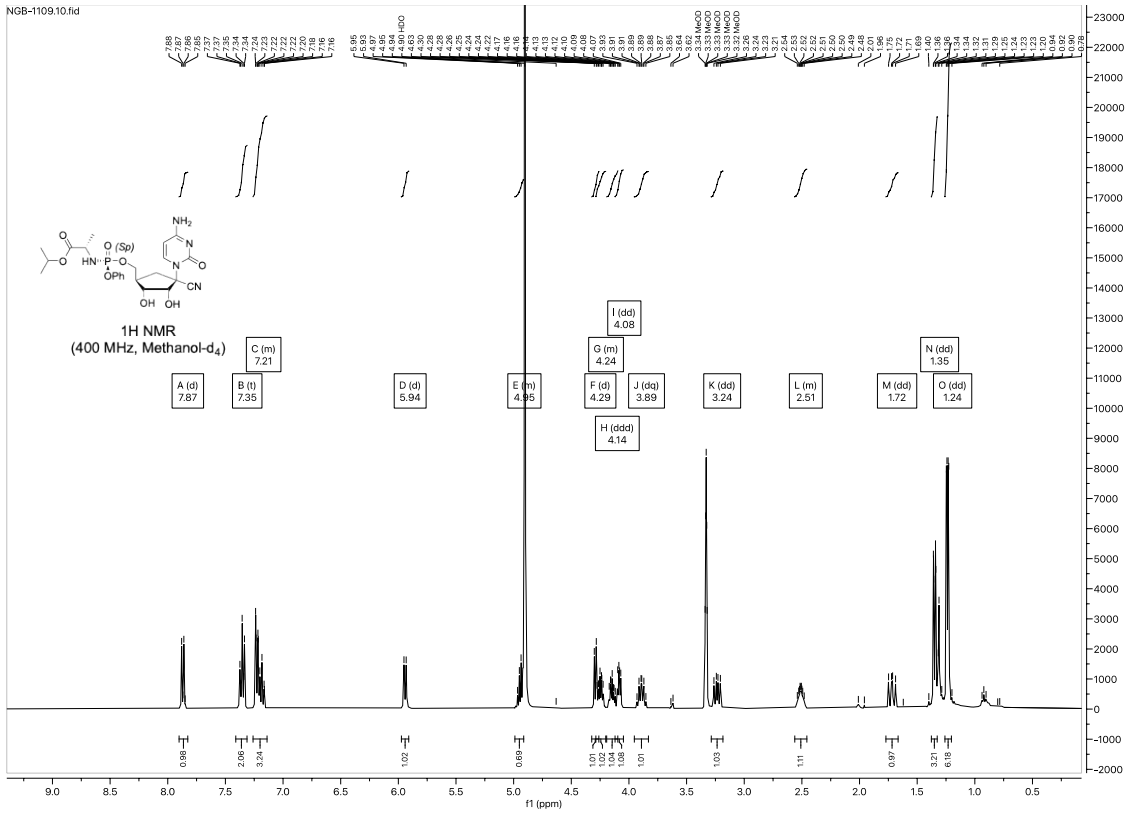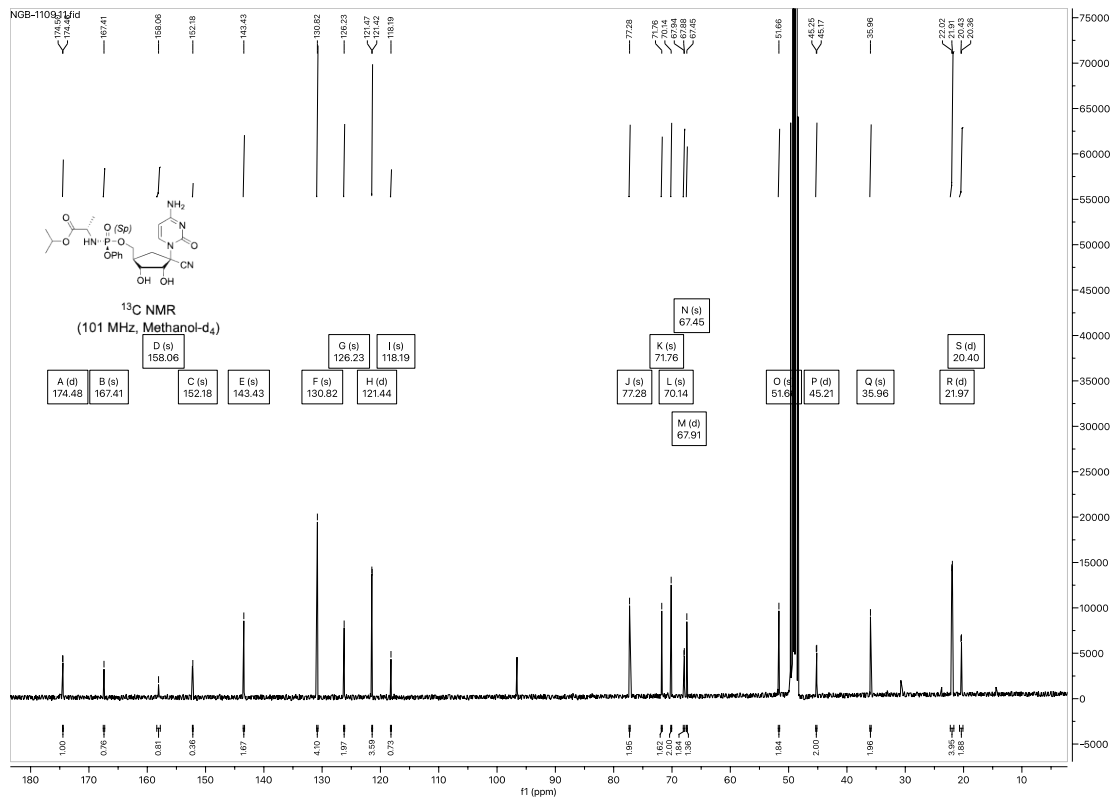

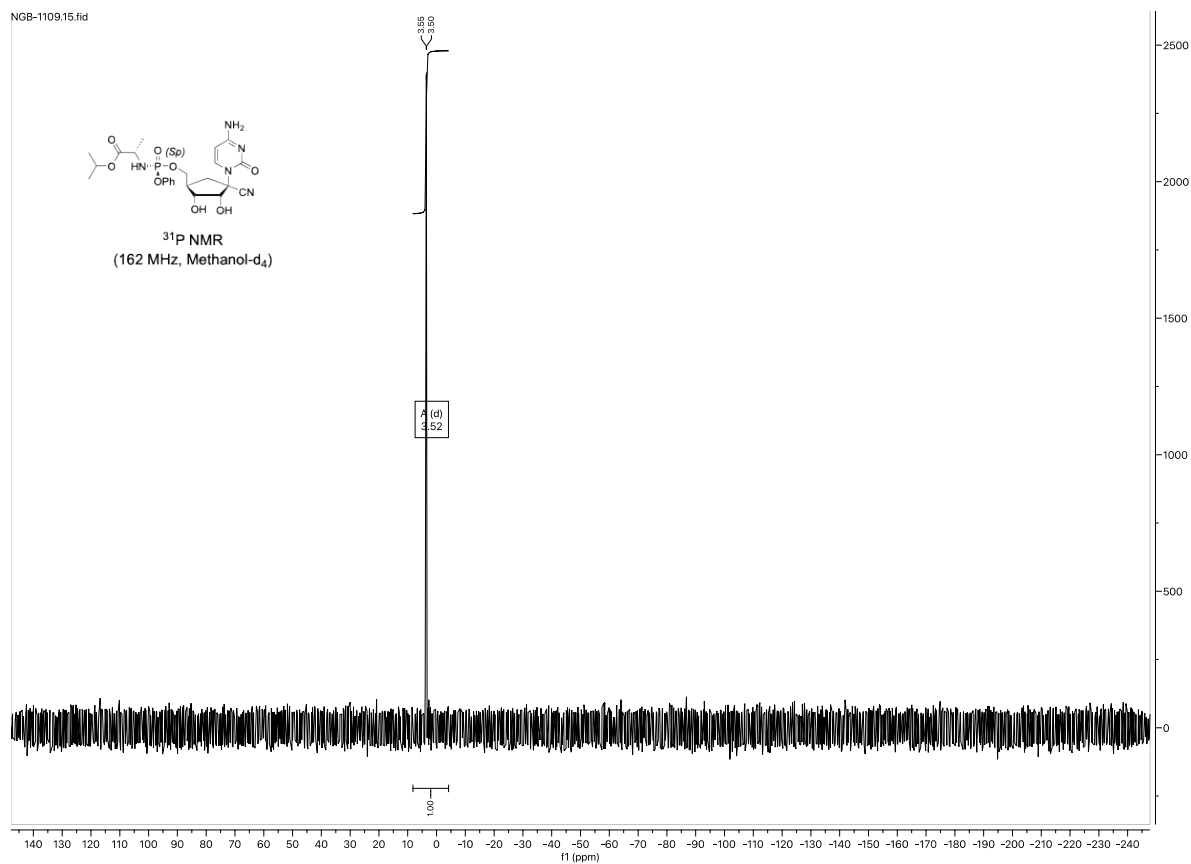

X

-ray crystallographic data of intermediate - 9A.<sup>1a-e</sup>

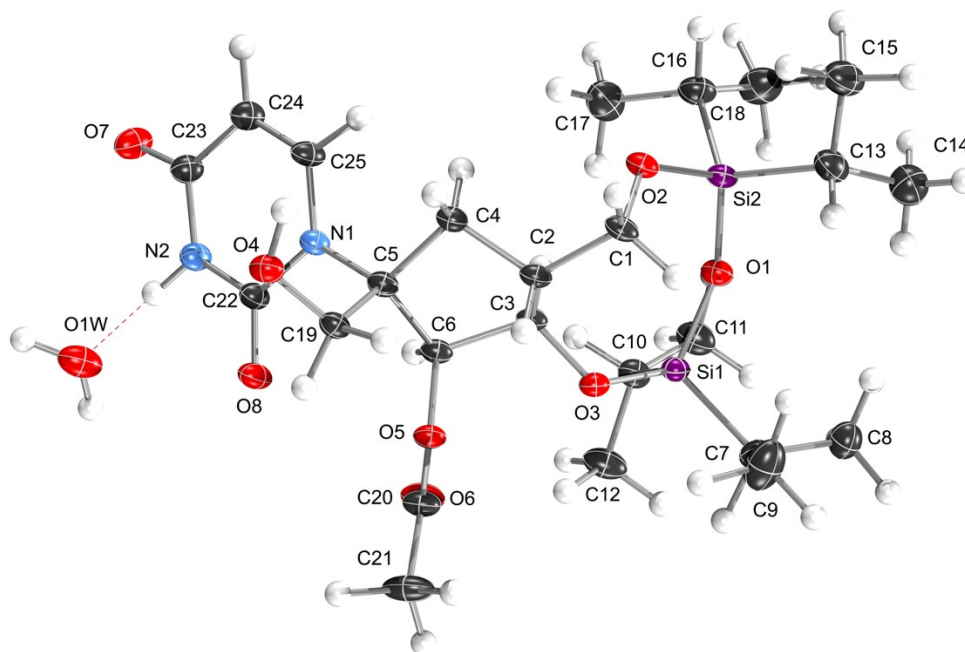

**Experimental.** Single colorless prism-shaped crystals of **9A** were recrystallised from methanol by slow evaporation. A suitable crystal with dimensions  $0.25 \times 0.17 \times 0.07 \text{ mm}^3$  was selected and mounted on a loop on a XtaLAB Synergy-S diffractometer. The crystal was kept at a steady  $T = 99.9(2) \text{ K}$  during data collection. The structure was solved with the ShelXT 2018/2 (Sheldrick, 2018) solution program using dual methods and by using Olex2 1.5-alpha (Dolomanov et al., 2009) as the graphical interface. The model was refined with olex2.refine 1.5-alpha (Bourhis et al., 2015) using full matrix least squares minimisation on  $F^2$ .

**Crystal Data.**  $\text{C}_{51}\text{H}_{96}\text{N}_4\text{O}_{19}\text{Si}_4$ ,  $M_r = 1181.688$ , triclinic,  $P1$  (No. 1),  $a = 9.4118(3) \text{ \AA}$ ,  $b = 9.4411(3) \text{ \AA}$ ,  $c = 19.4473(6) \text{ \AA}$ ,  $\alpha = 93.921(2)^\circ$ ,  $\beta = 94.270(2)^\circ$ ,  $\gamma = 115.720(3)^\circ$ ,  $V = 1542.74(9) \text{ \AA}^3$ ,  $T = 99.9(2) \text{ K}$ ,  $Z = 1$ ,  $Z' = 1$ ,  $\mu(\text{Cu K}\alpha) = 1.490$ , 22437 reflections measured, 7868 unique ( $R_{\text{int}} = 0.0756$ ) which were used in all calculations. The final  $wR_2$  was 0.1260 (all data) and  $R_1$  was 0.0573 ( $I \geq 2 \sigma(I)$ ).

| Compound                                       | 9A                                                                             |
|------------------------------------------------|--------------------------------------------------------------------------------|
| Formula                                        | C <sub>51</sub> H <sub>96</sub> N <sub>4</sub> O <sub>19</sub> Si <sub>4</sub> |
| <i>D</i> <sub>calc.</sub> / g cm <sup>-3</sup> | 1.272                                                                          |
| $\mu$ /mm <sup>-1</sup>                        | 1.490                                                                          |
| Formula Weight                                 | 1181.688                                                                       |
| Color                                          | colorless                                                                      |
| Shape                                          | prism-shaped                                                                   |
| Size/mm <sup>3</sup>                           | 0.25×0.17×0.07                                                                 |
| <i>T</i> /K                                    | 99.9(2)                                                                        |
| Crystal System                                 | triclinic                                                                      |
| Flack Parameter                                | 0.05(4)                                                                        |
| Hooft Parameter                                | 0.05(4)                                                                        |
| Space Group                                    | <i>P</i> 1                                                                     |
| <i>a</i> /Å                                    | 9.4118(3)                                                                      |
| <i>b</i> /Å                                    | 9.4411(3)                                                                      |
| <i>c</i> /Å                                    | 19.4473(6)                                                                     |
| $\alpha$ /°                                    | 93.921(2)                                                                      |
| $\beta$ /°                                     | 94.270(2)                                                                      |
| $\gamma$ /°                                    | 115.720(3)                                                                     |
| <i>V</i> /Å <sup>3</sup>                       | 1542.74(9)                                                                     |
| <i>Z</i>                                       | 1                                                                              |
| <i>Z</i> '                                     | 1                                                                              |
| Wavelength/Å                                   | 1.54184                                                                        |
| Radiation type                                 | Cu K $\alpha$                                                                  |
| $\theta$ <sub>min</sub> /°                     | 2.29                                                                           |
| $\theta$ <sub>max</sub> /°                     | 73.19                                                                          |
| Measured Refl's.                               | 22437                                                                          |
| Indep't Refl's                                 | 7868                                                                           |
| Refl's I $\geq$ 2 $\sigma$ (I)                 | 7024                                                                           |
| <i>R</i> <sub>int</sub>                        | 0.0756                                                                         |
| Parameters                                     | 1318                                                                           |
| Restraints                                     | 2522                                                                           |
| Largest Peak                                   | 0.2500                                                                         |
| Deepest Hole                                   | -0.2563                                                                        |
| Goof                                           | 1.1210                                                                         |
| <i>wR</i> <sub>2</sub> (all data)              | 0.1260                                                                         |
| <i>wR</i> <sub>2</sub>                         | 0.1223                                                                         |
| <i>R</i> <sub>1</sub> (all data)               | 0.0650                                                                         |
| <i>R</i> <sub>1</sub>                          | 0.0573                                                                         |

### Structure Quality Indicators

|                     |                                     |        |                 |      |                                   |       |                              |       |       |        |
|---------------------|-------------------------------------|--------|-----------------|------|-----------------------------------|-------|------------------------------|-------|-------|--------|
| <b>Reflections:</b> | d min (Cu\ a)<br>2 $\theta$ =146.4° | 0.81   | I/ $\sigma$ (I) | 13.7 | <i>R</i> <sub>int</sub><br>m=2.85 | 7.56% | Full 135.4°<br>94% to 146.4° | 98.8  |       |        |
| <b>Refinement:</b>  | Shift                               | -0.082 | Max Peak        | 0.2  | Min Peak                          | -0.3  | Goof                         | 1.121 | Hooft | .05(4) |

A colourless prism-shaped-shaped crystal with dimensions 0.25 × 0.17 × 0.07 mm<sup>3</sup> was mounted on a loop. Data were collected using a XtaLAB Synergy, Dualflex, HyPix diffractometer operating at *T* = 99.9(2) K. Data were measured using  $\omega$  scans with Cu K $\alpha$  radiation. The diffraction pattern was indexed

and the total number of runs and images was based on the strategy calculation from the program CrysAlisPro 1.171.42.74a (Rigaku OD, 2022). The maximum resolution that was achieved was  $\theta = 73.19^\circ$  (0.81 Å).

The unit cell was refined using CrysAlisPro 1.171.42.74a (Rigaku OD, 2022) on 8300 reflections, 37% of the observed reflections. Data reduction, scaling and absorption corrections were performed using CrysAlisPro 1.171.42.74a (Rigaku OD, 2022). The final completeness is 98.88 % out to  $73.19^\circ$  in  $\theta$ . A numerical absorption correction based on gaussian integration over a multifaceted crystal model was performed using CrysAlisPro 1.171.42.74a (Rigaku Oxford Diffraction, 2022). An empirical absorption correction using spherical harmonics, implemented in SCALE3 ABSPACK scaling algorithm was also applied. The absorption coefficient  $\mu$  of this material is  $1.490 \text{ mm}^{-1}$  at this wavelength ( $\lambda = 1.54184 \text{ \AA}$ ) and the minimum and maximum transmissions are 0.628 and 1.000.

The structure was solved and the space group  $P1$  (# 1) determined by the ShelXT 2018/2 (Sheldrick, 2018) structure solution program using dual methods and refined by full matrix least squares minimisation on  $F^2$  using version of olex2.refine 1.5-alpha (Bourhis et al., 2015). All non-hydrogen atoms were refined anisotropically. Hydrogen atom positions were calculated geometrically and refined using the riding model. Most hydrogen atom positions were calculated geometrically and refined using the riding model, but some hydrogen atoms were refined freely.

Hydrogen atom positions were located from the electron densities and freely refined using Hirshfeld scattering factors. Refinement was by using NoSpherA2, an implementation of non-spherical atom-form-factors (F. Kleemiss, H. Puschmann, O. Dolomanov, S. Grabowsky - <https://doi.org/10.1039/D0SC05526C> – 2020). NoSpherA2 implementation of HAR makes use of tailor-made aspherical atomic form factors calculated from a Hirshfeld-partitioned electron density (ED) not from spherical-atom form factors. The ED was calculated from a Gaussian basis set single determinant SCF wavefunction from DFT using selected functionals for a fragment of this crystal. The following options were used: SOFTWARE: ORCA PARTITIONING: NoSpherA2 INT ACCURACY: Normal METHOD: PBE BASIS SET: def2-SVP CHARGE: 0 MULTIPLICITY: 1 SOLVATION: Ethanol DATE: 2023-03-06\_18-51-20

The crystal structure shows the presence of an additional methanol molecule and two water molecules in the crystal lattice. The methanol shows long range disorder with the hydroxyl and methyl groups switching positions (head to tail disorder). Because there is only one whole methanol for two formula units of the target molecule, the formula unit is  $2(\text{C}_{25} \text{H}_{44} \text{N}_2 \text{O}_8 \text{Si}_2)$ ,  $2(\text{H}_2\text{O})$ ,  $(\text{CH}_3 \text{OH})$ . There is a single formula unit in the asymmetric unit (and the unit cell), which is represented by the reported sum formula. In other words: Z is 1 and Z' is 1.

The Flack parameter was refined to 0.1(1). Determination of absolute structure using Bayesian statistics on Bijvoet differences using the Olex2 results in 0.1(4). The chiral atoms in this structure are: C2(R), C2B(R), C3(R), C3B(R), C5(S), C5B(S), C6(S), C6B(S). It's important to note that the Flack parameter is a crucial parameter for determining the chirality of the crystal under study. Ideally, its value should be close to 0. A value of 1 indicates that the stereochemistry is incorrect and the model should be inverted. A value of 0.5 signifies that the crystal is a racemic mixture of both enantiomers.

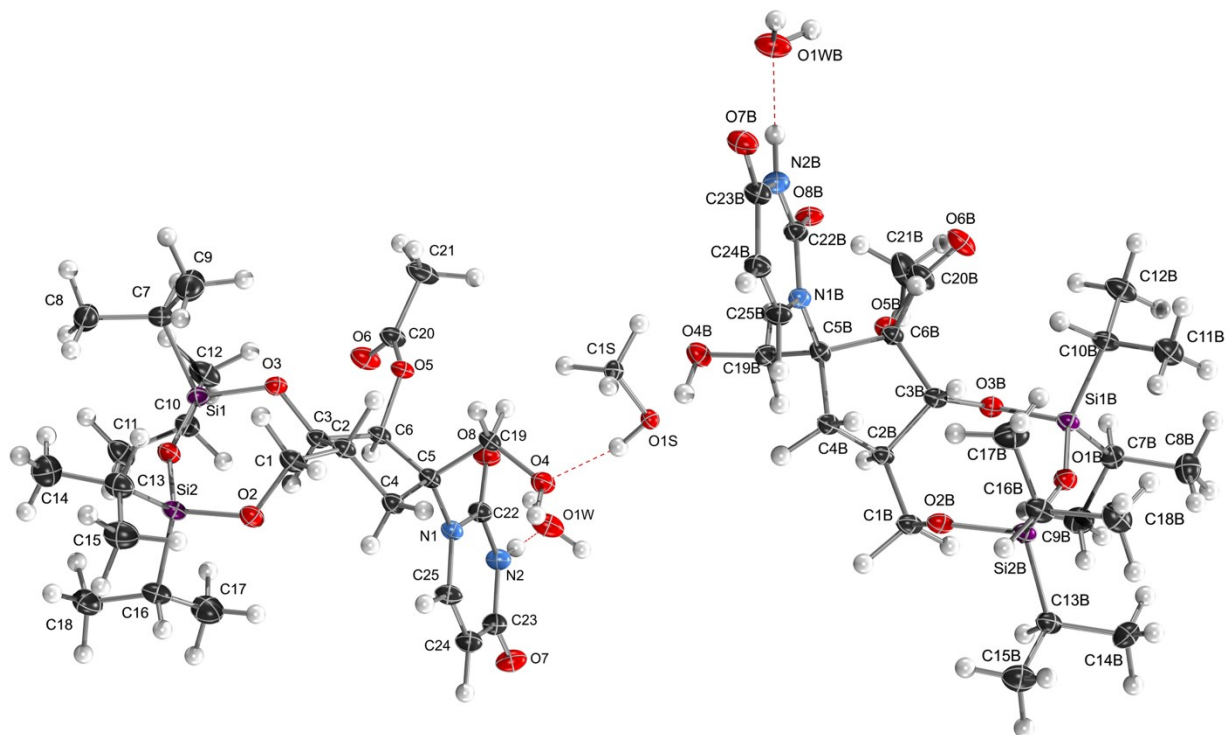

**Figure 1:** The repeating unit of the crystal structure of the sample. There is only one whole methanol for two formula units of the target molecule, the formula unit is  $2(\text{C}_{25} \text{H}_{44} \text{N}_2 \text{O}_8 \text{Si}_2)$ ,  $2(\text{H}_2\text{O})$ ,  $(\text{CH}_3 \text{OH})$ . There is a single formula unit in the asymmetric unit (and the unit cell), which is represented by the reported sum formula The methanol shows long range disorder with the hydroxyl and methyl groups switching positions (head to tail disorder).

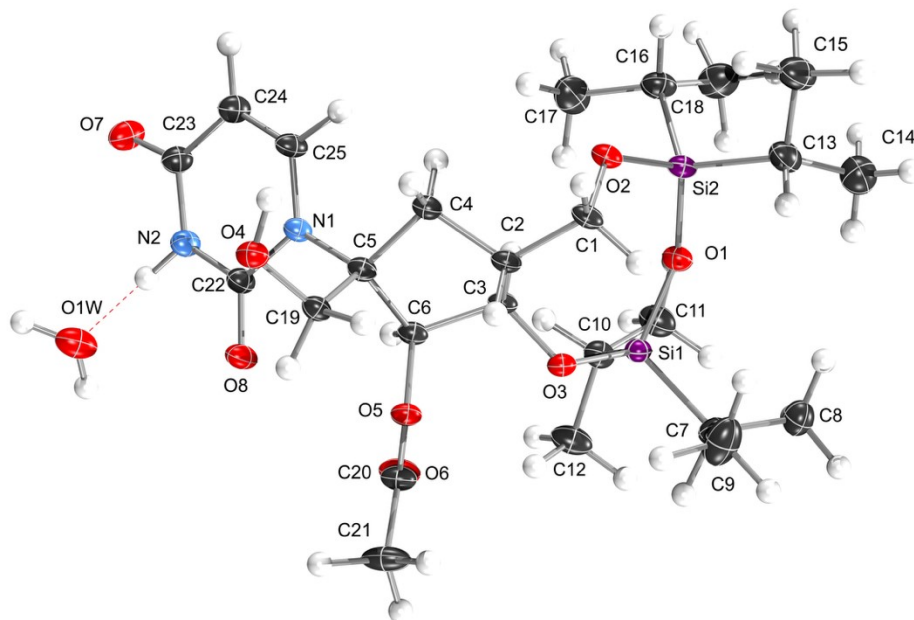

**Figure 2:** The molecular structure. The chiral atoms in this structure are: C2(R), C3(R), C5(S), C6(S).

## Data Plots: Diffraction Data

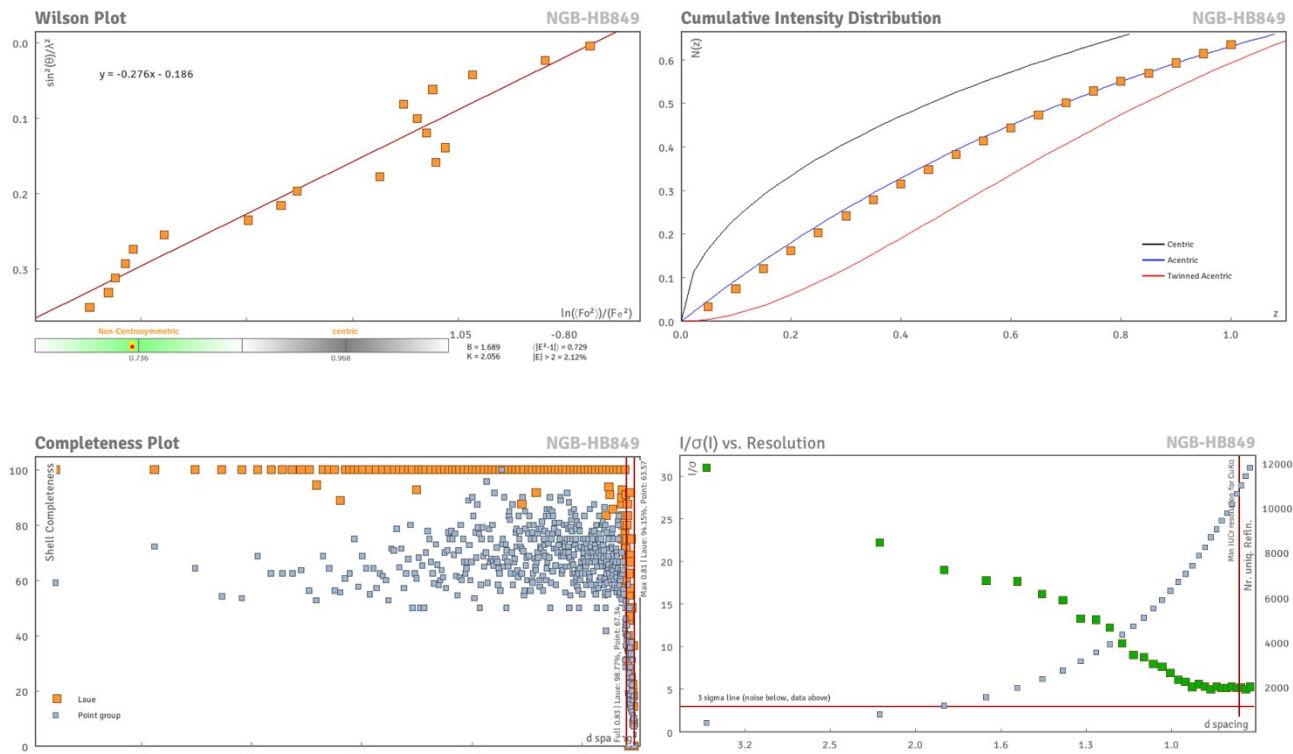

## Data Plots: Refinement and Data

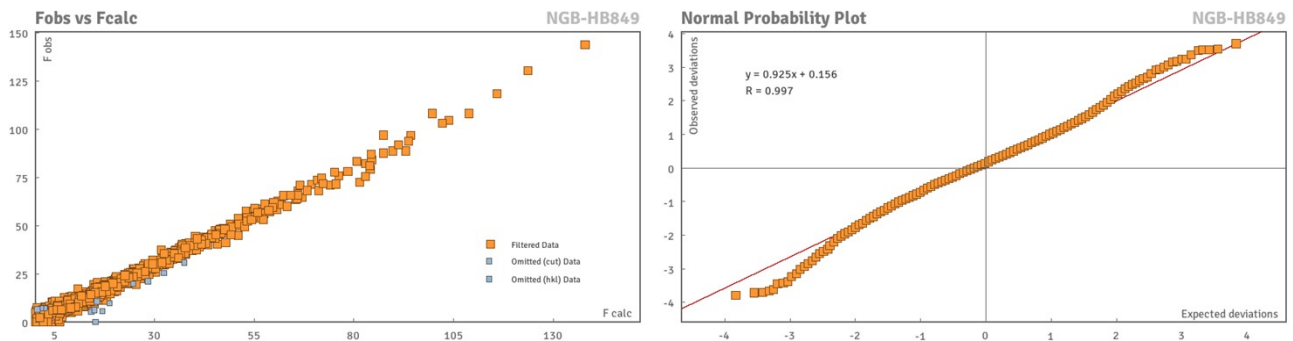

## Reflection Statistics

|                                     |              |                         |                 |
|-------------------------------------|--------------|-------------------------|-----------------|
| Total reflections (after filtering) | 22437        | Unique reflections      | 7868            |
| Completeness                        | 0.636        | Mean $I/\sigma$         | 10.41           |
| $hkl_{max}$ collected               | (11, 10, 24) | $hkl_{min}$ collected   | (-11, -11, -24) |
| $hkl_{max}$ used                    | (11, 10, 24) | $hkl_{min}$ used        | (-11, -11, -23) |
| Lim $d_{max}$ collected             | 100.0        | Lim $d_{min}$ collected | 0.77            |
| $d_{max}$ used                      | 19.27        | $d_{min}$ used          | 0.81            |
| Friedel pairs                       | 2042         | Friedel pairs merged    | 0               |

|                             |                                                                                 |                            |        |
|-----------------------------|---------------------------------------------------------------------------------|----------------------------|--------|
| Inconsistent equivalents    | 10                                                                              | $R_{\text{int}}$           | 0.0756 |
| $R_{\text{sigma}}$          | 0.073                                                                           | Intensity transformed      | 0      |
| Omitted reflections         | 0                                                                               | Omitted by user (OMIT hkl) | 23     |
| Multiplicity                | (2548, 1825, 1138, 920, 613,<br>353, 213, 113, 92, 35, 15, 9, 4,<br>1, 0, 1, 2) | Maximum multiplicity       | 17     |
| Removed systematic absences | 0                                                                               | Filtered off (Shel/OMIT)   | 0      |

**Table 1:** Fractional Atomic Coordinates ( $\times 10^4$ ) and Equivalent Isotropic Displacement Parameters ( $\text{\AA}^2 \times 10^3$ ) for **9A**.  $U_{eq}$  is defined as 1/3 of the trace of the orthogonalised  $U_{ij}$ .

| Atom | x           | y           | z          | $U_{eq}$ |
|------|-------------|-------------|------------|----------|
| Si1B | -1093.9(11) | 7784.8(11)  | 1610.1(5)  | 17.2(2)  |
| Si2B | 2232.1(11)  | 10847.5(11) | 1790.0(5)  | 17.5(2)  |
| O3B  | -607(3)     | 6840(3)     | 2197.0(13) | 19.1(6)  |
| O1B  | 424(3)      | 9478(3)     | 1554.7(14) | 20.9(6)  |
| O2B  | 3031(3)     | 10345(3)    | 2459.7(15) | 20.9(6)  |
| O8B  | -1634(3)    | 5906(3)     | 4775.3(15) | 22.9(6)  |
| O7B  | -628(3)     | 10133(3)    | 6318.6(15) | 29.5(7)  |
| O5B  | -1059(3)    | 5122(3)     | 3317.4(14) | 19.3(6)  |
| O6B  | -3590(3)    | 4794(3)     | 3173.2(16) | 30.1(7)  |
| O4B  | 2357(3)     | 6632(3)     | 4953.3(15) | 24.4(6)  |
| N1B  | 552(3)      | 8204(3)     | 4673.7(17) | 18.4(7)  |
| N2B  | -1075(4)    | 8042(4)     | 5540.0(18) | 23.9(7)  |
| C19B | 1327(4)     | 6118(4)     | 4309(2)    | 22.1(8)  |
| C5B  | 933(4)      | 7430(4)     | 4065(2)    | 17.2(8)  |
| C6B  | -499(4)     | 6791(4)     | 3469(2)    | 17.1(8)  |
| C3B  | 232(4)      | 7641(4)     | 2848(2)    | 17.0(7)  |
| C1B  | 3031(4)     | 8850(4)     | 2464(2)    | 21.9(8)  |
| C2B  | 1949(4)     | 7857(4)     | 2962(2)    | 17.5(7)  |
| C4B  | 2354(4)     | 8570(4)     | 3720(2)    | 18.6(8)  |
| C25B | 1536(5)     | 9713(5)     | 4958(2)    | 22.4(8)  |
| C24B | 1250(5)     | 10451(5)    | 5514(2)    | 23.6(9)  |
| C23B | -182(4)     | 9592(5)     | 5832(2)    | 23.0(8)  |
| C22B | -766(4)     | 7295(4)     | 4986(2)    | 20.0(8)  |
| C7B  | -1518(5)    | 6456(5)     | 787(2)     | 23.5(9)  |
| C8B  | -2159(5)    | 7007(5)     | 166(2)     | 31.3(10) |
| C9B  | -56(5)      | 6255(5)     | 627(2)     | 33.1(11) |
| C10B | -2766(4)    | 8199(4)     | 1871(2)    | 22.5(9)  |
| C12B | -4316(5)    | 6680(5)     | 1814(3)    | 29.8(10) |
| C11B | -3003(5)    | 9469(5)     | 1497(2)    | 29.2(10) |
| C13B | 3424(4)     | 10960(5)    | 1049(2)    | 22.2(9)  |
| C15B | 5099(5)     | 12333(5)    | 1192(3)    | 33.3(11) |
| C14B | 2626(5)     | 10993(5)    | 342(2)     | 33.9(11) |
| C16B | 2244(5)     | 12751(4)    | 2130(2)    | 23.6(9)  |
| C17B | 1347(5)     | 12540(5)    | 2776(3)    | 34.2(11) |
| C18B | 1594(5)     | 13486(5)    | 1591(2)    | 30.4(10) |
| C20B | -2651(5)    | 4251(5)     | 3206(2)    | 25.4(9)  |
| C21B | -3088(5)    | 2520(5)     | 3143(3)    | 40.0(12) |
| Si1  | 8607.2(11)  | 1447.7(11)  | 8379.4(6)  | 18.7(2)  |
| Si2  | 11624.5(11) | 4665.6(12)  | 8217.9(6)  | 20.3(2)  |
| O3   | 7379(3)     | 1642(3)     | 7784.0(13) | 19.3(6)  |
| O1   | 10344(3)    | 3000(3)     | 8442.8(14) | 22.6(6)  |

| Atom   | x        | y        | z          | $U_{eq}$ |
|--------|----------|----------|------------|----------|
| O2     | 10786(3) | 5183(3)  | 7571.9(15) | 22.3(6)  |
| O8     | 5154(3)  | -641(3)  | 5208.6(15) | 25.9(7)  |
| O7     | 8640(3)  | -393(3)  | 3675.1(16) | 30.3(7)  |
| O5     | 5100(3)  | 662(3)   | 6669.4(14) | 19.9(6)  |
| O6     | 4821(3)  | -1800(3) | 6792.1(17) | 31.2(7)  |
| O4     | 5788(3)  | 3237(3)  | 5035.8(15) | 25.1(6)  |
| N2     | 6933(4)  | -461(3)  | 4452.9(17) | 23.0(7)  |
| C5     | 7043(4)  | 2281(4)  | 5934(2)    | 18.9(7)  |
| C6     | 6705(4)  | 1144(4)  | 6513(2)    | 18.3(7)  |
| C3     | 7866(4)  | 2172(4)  | 7146(2)    | 17.8(7)  |
| C1     | 9260(4)  | 5159(4)  | 7561(2)    | 21.3(8)  |
| C2     | 8042(4)  | 3842(4)  | 7046(2)    | 19.0(7)  |
| C4     | 8356(4)  | 3875(4)  | 6285(2)    | 20.3(8)  |
| C23    | 8342(5)  | 290(4)   | 4161(2)    | 22.6(8)  |
| C24    | 9362(5)  | 1866(5)  | 4488(2)    | 24.9(9)  |
| C25    | 8910(5)  | 2443(4)  | 5045(2)    | 22.8(8)  |
| N1     | 7518(4)  | 1610(3)  | 5321.7(17) | 19.0(7)  |
| C22    | 6456(4)  | 133(4)   | 5002(2)    | 21.3(8)  |
| C7     | 7675(5)  | 1395(5)  | 9193(2)    | 28.2(9)  |
| C8     | 8775(5)  | 1619(5)  | 9854(2)    | 32.8(10) |
| C9     | 7004(6)  | 2617(6)  | 9240(3)    | 47.6(13) |
| C10    | 8899(5)  | -343(5)  | 8116(2)    | 23.7(8)  |
| C12    | 7379(5)  | -1871(5) | 8133(3)    | 33.5(11) |
| C11    | 10328(5) | -404(5)  | 8525(2)    | 31.6(10) |
| C13    | 12215(5) | 6189(5)  | 8990(2)    | 31.3(9)  |
| C15    | 13360(5) | 7825(5)  | 8842(3)    | 38.7(11) |
| C14    | 12850(6) | 5739(6)  | 9648(3)    | 44.3(13) |
| C16    | 13307(5) | 4468(5)  | 7840(2)    | 29.2(9)  |
| C18    | 14328(6) | 4007(6)  | 8336(3)    | 40.9(12) |
| C17    | 12700(5) | 3318(6)  | 7174(3)    | 42.1(12) |
| C20    | 4285(5)  | -841(5)  | 6789(2)    | 25.4(9)  |
| C21    | 2608(5)  | -1235(5) | 6893(3)    | 39.5(12) |
| C19    | 5613(4)  | 2554(4)  | 5676(2)    | 19.8(8)  |
| O1W    | 4879(3)  | -3522(3) | 3824.2(19) | 36.6(8)  |
| O1WB   | -3812(3) | 6328(3)  | 6168.7(18) | 34.0(8)  |
| O1S_1  | 3359(5)  | 3837(5)  | 4590(3)    | 16.2(8)  |
| C1S_1  | 3140(8)  | 4312(8)  | 5269(4)    | 17.0(8)  |
| O1SB_2 | 3201(5)  | 4446(5)  | 5381(3)    | 17.0(8)  |
| C1SB_2 | 3357(8)  | 3935(8)  | 4697(4)    | 16.2(8)  |

**Table 2:** Anisotropic Displacement Parameters ( $\times 10^4$ ) for **NGB-HB849**. The anisotropic displacement factor exponent takes the form:  $-2\pi^2[h^2a^{*2} \times U_{11} + \dots + 2hka^* \times b^* \times U_{12}]$

| Atom | $U_{11}$ | $U_{22}$ | $U_{33}$ | $U_{23}$ | $U_{13}$ | $U_{12}$ |
|------|----------|----------|----------|----------|----------|----------|
| Si1B | 14.8(5)  | 14.1(5)  | 21.4(5)  | 4.7(4)   | 3.3(4)   | 2.7(4)   |
| Si2B | 15.6(5)  | 14.6(5)  | 20.8(5)  | 4.8(4)   | 3.7(4)   | 3.0(4)   |
| O3B  | 18.9(13) | 14.5(13) | 22.6(13) | 5.9(10)  | 3.8(9)   | 1.7(9)   |
| O1B  | 19.4(15) | 20.0(15) | 24.2(15) | 8.4(12)  | 5.2(12)  | 6.4(12)  |
| O2B  | 17.4(14) | 14.5(12) | 29.3(16) | 4.5(9)   | 7.3(12)  | 5.5(10)  |
| O8B  | 18.9(14) | 17.6(12) | 28.2(16) | 3.1(9)   | 9.6(11)  | 4.9(9)   |
| O7B  | 22.8(15) | 30.7(17) | 33.0(16) | 11.0(12) | 5.3(11)  | -5.3(11) |

| Atom | $U_{11}$ | $U_{22}$ | $U_{33}$ | $U_{23}$ | $U_{13}$ | $U_{12}$ |
|------|----------|----------|----------|----------|----------|----------|
| O5B  | 19.2(14) | 11.6(13) | 25.3(15) | 5.2(11)  | 3.7(11)  | 1.1(11)  |
| O6B  | 17.0(16) | 23.6(16) | 48.1(19) | 8.0(13)  | 0.8(13)  | 3.2(14)  |
| O4B  | 20.4(15) | 21.7(15) | 32.9(15) | 10.4(12) | 3.0(11)  | 6.2(12)  |
| N1B  | 17.0(14) | 15.4(13) | 21.4(16) | 5.4(10)  | 3.9(10)  | 4.3(10)  |
| N2B  | 22.9(16) | 21.8(14) | 26.1(16) | 8.3(10)  | 6.6(10)  | 3.7(9)   |
| C19B | 20.0(19) | 19.3(19) | 26.9(18) | 7.2(14)  | 6.0(13)  | 9.5(14)  |
| H2B  | 42(15)   | 27(7)    | 49(17)   | 0(4)     | 27(8)    | -4(5)    |
| C5B  | 14.8(16) | 13.2(16) | 21.8(17) | 4.8(11)  | 0.5(10)  | 1.8(11)  |
| C6B  | 15.4(16) | 14.5(16) | 20.6(17) | 5.7(12)  | 2.9(10)  | 2.6(11)  |
| C3B  | 15.8(15) | 12.4(15) | 23.4(15) | 6.4(10)  | 4.9(9)   | 2.7(10)  |
| H3B  | 18(9)    | 13(3)    | 18(8)    | 8(2)     | 3(3)     | 2(2)     |
| C1B  | 17.8(17) | 19.2(15) | 30(2)    | 7.3(10)  | 8.0(12)  | 7.3(11)  |
| C2B  | 14.6(15) | 15.0(16) | 23.9(16) | 6.6(9)   | 5.2(9)   | 5.3(10)  |
| H2Ba | 17(8)    | 15(3)    | 28(9)    | 8(2)     | 7(3)     | 5.8(19)  |
| C4B  | 16.9(16) | 15.9(16) | 24.2(17) | 7.7(12)  | 4.3(10)  | 5.0(11)  |
| C25B | 19.9(18) | 19.3(16) | 25.8(18) | 6.1(11)  | 5.3(11)  | 3.4(11)  |
| H25B | 23(8)    | 24(9)    | 29(14)   | 2(4)     | 8(5)     | -2(5)    |
| C24B | 19.3(17) | 22.3(18) | 25.8(18) | 6.3(12)  | 3.6(11)  | 0.3(12)  |
| H24B | 37(13)   | 27(4)    | 50(18)   | -2(4)    | 22(8)    | -10(4)   |
| C23B | 20.5(17) | 21.9(16) | 27.5(18) | 9.8(10)  | 4.8(10)  | 2.3(10)  |
| C22B | 16.1(15) | 17.6(14) | 24.0(17) | 4.6(9)   | 4.3(10)  | 5.2(9)   |
| C7B  | 23(2)    | 17(2)    | 27(2)    | 6.2(17)  | 2.4(17)  | 6.3(17)  |
| C8B  | 36(3)    | 31(2)    | 28(2)    | 17(2)    | -1(2)    | -1.3(19) |
| C9B  | 32(3)    | 34(3)    | 32(3)    | 14(2)    | 5(2)     | -3(2)    |
| C10B | 16.4(18) | 19.0(17) | 31(2)    | 5.8(12)  | 6.2(14)  | 2.5(13)  |
| C12B | 19.0(19) | 20.3(18) | 48(3)    | 6.2(14)  | 6.7(16)  | 3.9(15)  |
| H12a | 20(9)    | 22(6)    | 51(8)    | 7(3)     | 8(3)     | 6(3)     |
| H12b | 22(5)    | 27(9)    | 54(9)    | 10(3)    | 9(3)     | 4(4)     |
| H12c | 25(9)    | 24(8)    | 48(3)    | 9(4)     | 5(2)     | 3(2)     |
| C11B | 25(2)    | 20.3(19) | 40(3)    | 8.1(14)  | 3.5(17)  | 3.9(15)  |
| H11a | 22(8)    | 16(8)    | 40(3)    | 7(3)     | 4(2)     | 5.1(19)  |
| H11b | 30(5)    | 27(8)    | 47(8)    | 13(3)    | 8(3)     | 5(3)     |
| H11c | 27(4)    | 22(4)    | 45(9)    | 6.9(19)  | 4(3)     | 4(2)     |
| C13B | 19(2)    | 20(2)    | 29(2)    | 8.7(17)  | 6.7(17)  | 5.8(18)  |
| C15B | 29(2)    | 26(2)    | 42(3)    | 7.5(19)  | 10(2)    | 5(2)     |
| C14B | 34(3)    | 45(3)    | 23(2)    | 16(2)    | 7.2(19)  | 9(2)     |
| C16B | 20.7(19) | 15.8(18) | 35(2)    | 8.2(13)  | 5.3(13)  | 2.2(13)  |
| C17B | 38(2)    | 27(2)    | 41(2)    | 15.1(18) | 15.3(16) | 5.5(16)  |
| H17a | 37(10)   | 27(4)    | 48(9)    | 15(3)    | 16(4)    | 5(3)     |
| H17b | 38(3)    | 30(6)    | 50(10)   | 14(2)    | 14(2)    | 6(3)     |
| H17c | 39(8)    | 28(9)    | 41(6)    | 16(4)    | 15(3)    | 6(3)     |
| C18B | 28(2)    | 20(2)    | 44(2)    | 11.7(15) | 2.9(15)  | 4.6(15)  |
| H18a | 29(3)    | 25(6)    | 46(9)    | 11(2)    | 2(2)     | 4(3)     |
| H18b | 38(10)   | 23(4)    | 49(9)    | 16(3)    | 3(4)     | 3(2)     |
| H18c | 32(7)    | 28(9)    | 45(5)    | 15(4)    | 5(3)     | 7(3)     |
| C20B | 15(2)    | 17(2)    | 38(2)    | 2.0(16)  | -2.7(17) | 1.0(18)  |
| C21B | 31(3)    | 23(2)    | 60(3)    | 9(2)     | -9(2)    | 5(2)     |
| H1Ba | 22(9)    | 23(8)    | 30(3)    | 10(3)    | 7.0(18)  | 6.1(18)  |
| H1Bb | 19(3)    | 24(9)    | 34(9)    | 9(2)     | 7(2)     | 7(4)     |
| H4Ba | 21(9)    | 17(3)    | 36(9)    | 10(2)    | 6(4)     | 7(2)     |
| H4Bb | 18(3)    | 17(9)    | 27(9)    | 8(2)     | 2(2)     | 2(4)     |
| H10B | 31(11)   | 23(8)    | 32(3)    | 11(4)    | 3(2)     | 1.2(19)  |
| H16B | 22(3)    | 30(11)   | 36(9)    | 6.4(19)  | 5.0(19)  | 4(4)     |

| Atom | $U_{11}$ | $U_{22}$ | $U_{33}$ | $U_{23}$ | $U_{13}$ | $U_{12}$ |
|------|----------|----------|----------|----------|----------|----------|
| H19a | 28(9)    | 21(13)   | 33(6)    | 7(4)     | 12(3)    | 9(4)     |
| H19b | 24(5)    | 25(7)    | 29(9)    | 3(3)     | 6(3)     | 10(3)    |
| H4B  | 26(4)    | 60(30)   | 41(13)   | -3(5)    | 1(3)     | 15(6)    |
| Si1  | 17.0(5)  | 17.4(5)  | 20.2(5)  | 5.6(4)   | 3.5(4)   | 4.1(4)   |
| Si2  | 14.4(5)  | 20.4(5)  | 24.2(5)  | 5.5(4)   | 4.3(4)   | 3.4(4)   |
| O3   | 17.3(13) | 17.8(13) | 22.2(12) | 6.5(9)   | 5.3(8)   | 4.4(8)   |
| O1   | 17.2(12) | 22.4(12) | 27.1(15) | 7.5(8)   | 3.1(9)   | 4.8(9)   |
| O2   | 17.0(12) | 17.8(13) | 28.0(15) | 3.9(8)   | 2.6(9)   | 3.0(10)  |
| O8   | 19.4(12) | 20.8(14) | 30.9(16) | 2.9(9)   | 6.0(9)   | -1.5(11) |
| O7   | 36.1(17) | 22.2(15) | 33.4(15) | 12.2(11) | 14.1(10) | 2.1(10)  |
| O5   | 14.2(11) | 20.1(12) | 26.0(15) | 7.3(8)   | 6.1(9)   | 3.8(9)   |
| O6   | 23.1(15) | 22.3(14) | 48.9(19) | 8.8(9)   | 10.1(13) | 10.2(12) |
| O4   | 19.8(15) | 25.7(15) | 29.7(14) | 9.2(12)  | 4.8(10)  | 6.1(11)  |
| N2   | 22.7(14) | 18.1(15) | 26.0(15) | 7.0(10)  | 5.5(9)   | -0.4(10) |
| C5   | 15.1(15) | 16.9(15) | 24.9(15) | 7.3(9)   | 2.7(8)   | 2.9(9)   |
| C6   | 14.7(14) | 15.6(15) | 25.8(17) | 7.3(9)   | 4.6(9)   | 3.1(9)   |
| H6   | 18(9)    | 16(4)    | 29(9)    | 8(3)     | 7(3)     | 4(2)     |
| C3   | 14.7(16) | 13.6(14) | 24.3(15) | 4.9(9)   | 4.2(9)   | 4.4(8)   |
| H3   | 17(3)    | 24(9)    | 28(9)    | 10(2)    | 6(2)     | 7(3)     |
| C1   | 17.0(15) | 12.5(15) | 30.5(19) | 3.0(9)   | 1.6(10)  | 1.5(12)  |
| H1a  | 28(9)    | 16(3)    | 40(9)    | 8(2)     | 5(3)     | 6(2)     |
| H1b  | 20(8)    | 12(9)    | 31(3)    | 4(4)     | 3(2)     | 2(2)     |
| C2   | 15.3(16) | 14.5(14) | 25.9(16) | 4.9(9)   | 3.7(10)  | 3.4(9)   |
| H2a  | 16(3)    | 16(9)    | 31(9)    | 6(2)     | 5(2)     | 5(4)     |
| C4   | 16.5(17) | 17.3(16) | 25.7(17) | 5.7(11)  | 3.0(10)  | 4.5(9)   |
| H4a  | 25(8)    | 22(4)    | 30(8)    | 11(3)    | 6(3)     | 8(2)     |
| H4c  | 18(3)    | 21(9)    | 32(9)    | 7(2)     | 4.4(19)  | 5(3)     |
| C23  | 23.3(15) | 18.7(15) | 26.8(17) | 9.5(9)   | 6.0(9)   | 3.5(9)   |
| C24  | 23.9(17) | 21.0(15) | 30.1(18) | 9.7(10)  | 7.1(10)  | 2.1(10)  |
| C25  | 19.1(15) | 15.1(16) | 30.9(18) | 3.9(10)  | 6.8(9)   | 0.8(10)  |
| N1   | 16.5(12) | 15.3(12) | 23.8(14) | 5.7(8)   | 3.1(8)   | 1.8(8)   |
| C22  | 18.8(13) | 17.7(13) | 24.3(16) | 5.4(8)   | 3.2(8)   | -0.2(9)  |
| C7   | 22.1(19) | 38(2)    | 25.2(17) | 12.9(13) | 7.7(10)  | 5.7(12)  |
| C8   | 36(2)    | 37(2)    | 27(2)    | 17.5(17) | 2.5(14)  | 5.3(15)  |
| H8a  | 38(9)    | 38(5)    | 33(10)   | 19(3)    | 3(4)     | 5(3)     |
| H8b  | 36(5)    | 37(4)    | 27(10)   | 18(2)    | 2(3)     | 6(2)     |
| H8c  | 43(8)    | 42(10)   | 30(5)    | 21(4)    | 7(3)     | 7(3)     |
| C9   | 58(3)    | 71(3)    | 34(3)    | 46.7(18) | 8(2)     | 5(2)     |
| H9a  | 64(9)    | 78(11)   | 36(5)    | 51(4)    | 12(3)    | 7(3)     |
| H9b  | 63(6)    | 71(4)    | 38(11)   | 44(2)    | 9(3)     | 6(3)     |
| H9c  | 61(7)    | 78(10)   | 36(5)    | 49(4)    | 7(3)     | 5(3)     |
| C10  | 22.4(17) | 20.5(16) | 29(2)    | 9.8(10)  | 3.8(12)  | 1.9(11)  |
| C12  | 24.8(19) | 20.1(18) | 54(3)    | 8.2(13)  | 6.0(16)  | 4.6(15)  |
| H12d | 27(10)   | 22(5)    | 56(8)    | 10(3)    | 5(4)     | 3(3)     |
| H12e | 32(10)   | 27(10)   | 55(4)    | 13(4)    | 8(2)     | 7(2)     |
| H12f | 27(5)    | 24(10)   | 57(9)    | 11(3)    | 5(3)     | 4(4)     |
| C11  | 26(2)    | 28(2)    | 43(3)    | 14.0(13) | 2.2(15)  | 4.7(17)  |
| H11d | 30(9)    | 36(9)    | 43(3)    | 17(4)    | 3(2)     | 6(2)     |
| H11e | 29(9)    | 29(5)    | 49(9)    | 16(3)    | 5(4)     | 4(3)     |
| H11f | 27(4)    | 30(4)    | 47(10)   | 13.0(19) | 3(3)     | 5(3)     |
| C13  | 25(2)    | 28.0(19) | 34.6(19) | 7.2(12)  | 3.8(12)  | -5.7(11) |
| H13  | 26(4)    | 32(9)    | 33(9)    | 9(3)     | 4(2)     | -6(3)    |
| C15  | 33(2)    | 30(2)    | 45(3)    | 7.7(15)  | 8.3(17)  | -3.2(14) |

| Atom   | $U_{11}$ | $U_{22}$ | $U_{33}$ | $U_{23}$ | $U_{13}$ | $U_{12}$ |
|--------|----------|----------|----------|----------|----------|----------|
| H15d   | 34(9)    | 25(9)    | 46(6)    | 5(4)     | 6(3)     | -4(3)    |
| H15e   | 33(10)   | 37(7)    | 49(5)    | 9(3)     | 7(3)     | -8(3)    |
| H15f   | 34(4)    | 30(10)   | 49(10)   | 8(3)     | 10(3)    | -1(4)    |
| C14    | 39(3)    | 50(3)    | 40(2)    | 16.7(19) | 2.4(16)  | 1.4(16)  |
| H14d   | 42(6)    | 51(4)    | 49(9)    | 17(2)    | 5(3)     | 4(3)     |
| H14e   | 42(4)    | 57(10)   | 48(9)    | 21(3)    | 4(3)     | 2(4)     |
| H14f   | 46(9)    | 53(6)    | 43(5)    | 19(3)    | 2(3)     | -1(3)    |
| C16    | 20.4(18) | 30(2)    | 37(2)    | 10.3(11) | 8.8(11)  | 3.8(13)  |
| H16    | 24(6)    | 31(3)    | 35(9)    | 9.2(18)  | 8(3)     | 3(2)     |
| C18    | 32(2)    | 53(3)    | 46(3)    | 24.6(17) | 10.1(16) | 12.1(19) |
| C17    | 36(3)    | 47(3)    | 42(2)    | 19.3(17) | 5.5(16)  | -8.0(16) |
| H17d   | 40(9)    | 52(9)    | 46(6)    | 22(4)    | 4(3)     | -5(3)    |
| H17e   | 39(5)    | 53(10)   | 47(9)    | 23(3)    | 8(3)     | -6(4)    |
| H17f   | 40(6)    | 50(4)    | 55(10)   | 18(2)    | 9(3)     | -4(3)    |
| C20    | 18.3(15) | 22.0(14) | 35(2)    | 6.6(8)   | 7.2(11)  | 8.3(10)  |
| C21    | 21.1(17) | 39(2)    | 63(3)    | 13.5(11) | 16.6(13) | 24.8(19) |
| H21d   | 25(6)    | 39(4)    | 63(7)    | 13.2(19) | 16(3)    | 25(3)    |
| H21e   | 27(7)    | 40(4)    | 65(6)    | 15(2)    | 19(3)    | 25(3)    |
| H21f   | 27(6)    | 44(8)    | 65(4)    | 14(3)    | 13.2(19) | 25(2)    |
| C19    | 13.8(16) | 20.6(18) | 24.8(16) | 7.6(10)  | 1.9(10)  | 1.5(11)  |
| H19c   | 19(8)    | 22(5)    | 27(4)    | 9(3)     | 4(2)     | 1(2)     |
| H19d   | 15(4)    | 21(3)    | 29(7)    | 7.3(15)  | 2.3(19)  | 1.4(17)  |
| H24    | 22(6)    | 19(7)    | 27(12)   | 12(3)    | 5(4)     | 6(4)     |
| H25    | 34(9)    | 31(8)    | 59(15)   | -11(4)   | 27(6)    | -20(6)   |
| H2     | 23(8)    | 18(6)    | 25(14)   | 8(3)     | 4(5)     | 1(4)     |
| H7     | 25(5)    | 41(4)    | 29(10)   | 12(2)    | 9(3)     | 5(2)     |
| H10    | 23(9)    | 21(9)    | 29(3)    | 9(4)     | 3.7(18)  | 1.2(16)  |
| H18d   | 32(7)    | 54(5)    | 50(8)    | 26(3)    | 12(3)    | 14(3)    |
| H18e   | 34(7)    | 58(12)   | 49(9)    | 27(4)    | 12(4)    | 12(4)    |
| H18f   | 34(8)    | 56(6)    | 47(4)    | 26(3)    | 9(2)     | 10(3)    |
| H4     | 40(14)   | 44(12)   | 39(10)   | -10(6)   | -7(5)    | 18(4)    |
| O1W    | 27.1(18) | 27.2(17) | 54(2)    | 10.6(14) | 10.1(17) | 1.4(16)  |
| H1Wa   | 50(40)   | 33(14)   | 55(3)    | -12(16)  | 13(2)    | -1(2)    |
| H1Wb   | 100(40)  | 27(5)    | 59(12)   | 21(8)    | 38(15)   | 2(4)     |
| O1WB   | 27.8(18) | 23.2(17) | 49(2)    | 8.8(14)  | 14.1(16) | 1.4(15)  |
| H1Wc   | 48(18)   | 53(16)   | 90(30)   | 33(8)    | -12(9)   | -31(10)  |
| H1Wd   | 27(9)    | 40(20)   | 50(20)   | 13(5)    | 14(7)    | -9(9)    |
| O1S_1  | 15.8(12) | 16.6(12) | 17.1(15) | 8.0(7)   | 1.0(7)   | 1.3(7)   |
| H1S_1  | 38(15)   | 37(15)   | 38(15)   | 16(3)    | 4.4(12)  | 4.2(12)  |
| C1S_1  | 18.1(12) | 16.0(12) | 17.6(15) | 8.2(7)   | 1.4(7)   | 2.0(7)   |
| H1Sa_1 | 20(2)    | 26(10)   | 35(19)   | 11.0(16) | 5(2)     | 10(6)    |
| H1Sb_1 | 27(9)    | 30(9)    | 33(12)   | 13(4)    | 0(4)     | 13(5)    |
| H1Sc_1 | 21(8)    | 17(2)    | 17(17)   | 8.5(12)  | 3(5)     | 2.4(13)  |
| O1SB_2 | 18.1(12) | 16.0(12) | 17.6(15) | 8.2(7)   | 1.4(7)   | 2.0(7)   |
| H1SB_2 | 36(15)   | 36(15)   | 36(15)   | 16(3)    | 4.2(12)  | 4.1(12)  |
| C1SB_2 | 15.8(12) | 16.6(12) | 17.1(15) | 8.0(7)   | 1.0(7)   | 1.3(7)   |
| H1Sa_2 | 17(3)    | 22(9)    | 28(18)   | 9.4(17)  | 4(2)     | 6(6)     |
| H1Sc_2 | 23(9)    | 18(2)    | 23(18)   | 9.6(13)  | 3(5)     | 1.9(14)  |
| H1Sd_2 | 24(7)    | 27(10)   | 28(12)   | 13(4)    | -3(4)    | 6(5)     |

**Table 3:** Bond Lengths in Å for **9A**.

| Atom | Atom | Length/Å   |
|------|------|------------|
| Si1B | O3B  | 1.651(3)   |
| Si1B | O1B  | 1.635(3)   |
| Si1B | C7B  | 1.869(4)   |
| Si1B | C10B | 1.875(4)   |
| Si2B | O1B  | 1.634(3)   |
| Si2B | O2B  | 1.653(3)   |
| Si2B | C13B | 1.872(4)   |
| Si2B | C16B | 1.867(4)   |
| O3B  | C3B  | 1.414(4)   |
| O2B  | C1B  | 1.412(4)   |
| O8B  | C22B | 1.226(4)   |
| O7B  | C23B | 1.230(5)   |
| O5B  | C6B  | 1.428(4)   |
| O5B  | C20B | 1.352(4)   |
| O6B  | C20B | 1.198(5)   |
| O4B  | C19B | 1.439(5)   |
| O4B  | H4B  | 0.9550(17) |
| N1B  | C5B  | 1.496(5)   |
| N1B  | C25B | 1.366(5)   |
| N1B  | C22B | 1.379(5)   |
| N2B  | H2B  | 0.982(3)   |
| N2B  | C23B | 1.384(5)   |
| N2B  | C22B | 1.366(5)   |
| C19B | C5B  | 1.533(5)   |
| C19B | H19a | 1.14(4)    |
| C19B | H19b | 1.10(4)    |
| C5B  | C6B  | 1.578(5)   |
| C5B  | C4B  | 1.542(5)   |
| C6B  | C3B  | 1.534(5)   |
| C6B  | H6B  | 1.16(6)    |
| C3B  | H3B  | 1.11(4)    |
| C3B  | C2B  | 1.535(5)   |
| C1B  | C2B  | 1.515(5)   |
| C1B  | H1Ba | 1.11(5)    |
| C1B  | H1Bb | 1.19(4)    |
| C2B  | H2Ba | 1.03(4)    |
| C2B  | C4B  | 1.526(6)   |
| C4B  | H4Ba | 1.14(4)    |
| C4B  | H4Bb | 1.12(4)    |
| C25B | H25B | 1.11(4)    |
| C25B | C24B | 1.352(6)   |
| C24B | H24B | 1.01(5)    |
| C24B | C23B | 1.449(6)   |
| C7B  | H7B  | 1.0000     |
| C7B  | C8B  | 1.530(6)   |
| C7B  | C9B  | 1.519(6)   |
| C8B  | H8Ba | 1.08(3)    |
| C8B  | H8Bb | 1.08(3)    |
| C8B  | H8Bc | 1.08(3)    |
| C9B  | H9Ba | 1.10(3)    |
| C9B  | H9Bb | 1.10(3)    |
| C9B  | H9Bc | 1.10(3)    |
| C10B | C12B | 1.529(5)   |

| <b>Atom</b> | <b>Atom</b> | <b>Length/Å</b> |
|-------------|-------------|-----------------|
| C10B        | C11B        | 1.530(6)        |
| C10B        | H10B        | 1.16(5)         |
| C12B        | H12a        | 1.06(3)         |
| C12B        | H12b        | 1.06(3)         |
| C12B        | H12c        | 1.06(3)         |
| C11B        | H11a        | 0.9800          |
| C11B        | H11b        | 0.9800          |
| C11B        | H11c        | 0.9800          |
| C13B        | C15B        | 1.535(5)        |
| C13B        | C14B        | 1.525(6)        |
| C13B        | H13B        | 1.07(5)         |
| C15B        | H15a        | 1.06(3)         |
| C15B        | H15b        | 1.06(3)         |
| C15B        | H15c        | 1.06(3)         |
| C14B        | H14a        | 1.08(3)         |
| C14B        | H14b        | 1.08(3)         |
| C14B        | H14c        | 1.08(3)         |
| C16B        | C17B        | 1.542(6)        |
| C16B        | C18B        | 1.526(6)        |
| C16B        | H16B        | 1.09(5)         |
| C17B        | H17a        | 1.08(3)         |
| C17B        | H17b        | 1.08(3)         |
| C17B        | H17c        | 1.08(3)         |
| C18B        | H18a        | 1.08(3)         |
| C18B        | H18b        | 1.08(3)         |
| C18B        | H18c        | 1.08(3)         |
| C20B        | C21B        | 1.496(6)        |
| C21B        | H21a        | 1.06(3)         |
| C21B        | H21b        | 1.06(3)         |
| C21B        | H21c        | 1.06(3)         |
| Si1         | O3          | 1.650(3)        |
| Si1         | O1          | 1.644(3)        |
| Si1         | C7          | 1.858(4)        |
| Si1         | C10         | 1.871(4)        |
| Si2         | O1          | 1.626(3)        |
| Si2         | O2          | 1.646(3)        |
| Si2         | C13         | 1.876(4)        |
| Si2         | C16         | 1.870(4)        |
| O3          | C3          | 1.404(4)        |
| O2          | C1          | 1.425(5)        |
| O8          | C22         | 1.238(5)        |
| O7          | C23         | 1.225(5)        |
| O5          | C6          | 1.440(4)        |
| O5          | C20         | 1.335(5)        |
| O6          | C20         | 1.213(5)        |
| O4          | C19         | 1.429(5)        |
| O4          | H4          | 0.9550(17)      |
| N2          | C23         | 1.391(5)        |
| N2          | C22         | 1.365(5)        |
| N2          | H2          | 0.9819(15)      |
| C5          | C6          | 1.563(5)        |
| C5          | C4          | 1.542(5)        |
| C5          | N1          | 1.497(5)        |

| <b>Atom</b> | <b>Atom</b> | <b>Length/Å</b> |
|-------------|-------------|-----------------|
| C5          | C19         | 1.532(5)        |
| C6          | H6          | 1.11(4)         |
| C6          | C3          | 1.539(5)        |
| C3          | H3          | 1.12(4)         |
| C3          | C2          | 1.540(5)        |
| C1          | H1a         | 1.09(3)         |
| C1          | H1b         | 1.09(3)         |
| C1          | C2          | 1.511(5)        |
| C2          | H2a         | 1.19(4)         |
| C2          | C4          | 1.531(6)        |
| C4          | H4a         | 0.9900          |
| C4          | H4c         | 0.9900          |
| C23         | C24         | 1.442(6)        |
| C24         | C25         | 1.356(6)        |
| C24         | H24         | 1.08(4)         |
| C25         | N1          | 1.376(5)        |
| C25         | H25         | 1.07(5)         |
| N1          | C22         | 1.382(5)        |
| C7          | C8          | 1.532(6)        |
| C7          | C9          | 1.538(6)        |
| C7          | H7          | 1.20(5)         |
| C8          | H8a         | 1.07(3)         |
| C8          | H8b         | 1.07(3)         |
| C8          | H8c         | 1.07(3)         |
| C9          | H9a         | 1.11(3)         |
| C9          | H9b         | 1.11(3)         |
| C9          | H9c         | 1.11(3)         |
| C10         | C12         | 1.533(5)        |
| C10         | C11         | 1.536(6)        |
| C10         | H10         | 1.09(5)         |
| C12         | H12d        | 1.11(3)         |
| C12         | H12e        | 1.11(3)         |
| C12         | H12f        | 1.11(3)         |
| C11         | H11d        | 1.06(3)         |
| C11         | H11e        | 1.06(3)         |
| C11         | H11f        | 1.06(3)         |
| C13         | H13         | 1.09(5)         |
| C13         | C15         | 1.514(6)        |
| C13         | C14         | 1.535(7)        |
| C15         | H15d        | 1.15(3)         |
| C15         | H15e        | 1.15(3)         |
| C15         | H15f        | 1.15(3)         |
| C14         | H14d        | 0.9800          |
| C14         | H14e        | 0.9800          |
| C14         | H14f        | 0.9800          |
| C16         | H16         | 1.08(5)         |
| C16         | C18         | 1.525(7)        |
| C16         | C17         | 1.531(6)        |
| C18         | H18d        | 1.09(6)         |
| C18         | H18e        | 1.21(5)         |
| C18         | H18f        | 1.00(6)         |
| C17         | H17d        | 1.09(3)         |
| C17         | H17e        | 1.09(3)         |

| Atom   | Atom   | Length/Å   |
|--------|--------|------------|
| C17    | H17f   | 1.09(3)    |
| C20    | C21    | 1.489(6)   |
| C21    | H21d   | 1.12(3)    |
| C21    | H21e   | 1.12(3)    |
| C21    | H21f   | 1.12(3)    |
| C19    | H19c   | 1.09(3)    |
| C19    | H19d   | 1.09(3)    |
| O1W    | H1Wa   | 0.952(16)  |
| O1W    | H1Wb   | 0.948(16)  |
| O1WB   | H1Wc   | 0.960(16)  |
| O1WB   | H1Wd   | 0.955(16)  |
| O1S_1  | H1S_1  | 0.9751(17) |
| O1S_1  | C1S_1  | 1.424(3)   |
| C1S_1  | H1Sa_1 | 1.0830     |
| C1S_1  | H1Sb_1 | 1.0830     |
| C1S_1  | H1Sc_1 | 1.0830     |
| O1SB_2 | H1SB_2 | 0.9752(17) |
| O1SB_2 | C1SB_2 | 1.423(3)   |
| C1SB_2 | H1Sa_2 | 1.0830     |
| C1SB_2 | H1Sc_2 | 1.0830     |
| C1SB_2 | H1Sd_2 | 1.0830     |

**Table 4:** Bond Angles in ° for **9A**.

| Atom | Atom | Atom | Angle/°    |
|------|------|------|------------|
| O1B  | Si1B | O3B  | 109.68(13) |
| C7B  | Si1B | O3B  | 103.25(16) |
| C7B  | Si1B | O1B  | 109.42(16) |
| C10B | Si1B | O3B  | 110.07(16) |
| C10B | Si1B | O1B  | 108.00(15) |
| C10B | Si1B | C7B  | 116.28(18) |
| O2B  | Si2B | O1B  | 109.46(13) |
| C13B | Si2B | O1B  | 108.04(16) |
| C13B | Si2B | O2B  | 108.31(16) |
| C16B | Si2B | O1B  | 111.38(16) |
| C16B | Si2B | O2B  | 103.92(17) |
| C16B | Si2B | C13B | 115.54(18) |
| C3B  | O3B  | Si1B | 120.8(2)   |
| Si2B | O1B  | Si1B | 153.50(18) |
| C1B  | O2B  | Si2B | 122.8(3)   |
| C20B | O5B  | C6B  | 116.2(3)   |
| H4B  | O4B  | C19B | 116(4)     |
| C25B | N1B  | C5B  | 122.0(3)   |
| C22B | N1B  | C5B  | 117.7(3)   |
| C22B | N1B  | C25B | 120.0(3)   |
| C23B | N2B  | H2B  | 120(3)     |
| C22B | N2B  | H2B  | 113(3)     |
| C22B | N2B  | C23B | 126.9(3)   |
| C5B  | C19B | O4B  | 111.7(3)   |
| H19a | C19B | O4B  | 114(2)     |

| Atom | Atom | Atom | Angle/°    |
|------|------|------|------------|
| H19a | C19B | C5B  | 103(2)     |
| H19b | C19B | O4B  | 108(2)     |
| H19b | C19B | C5B  | 111(2)     |
| H19b | C19B | H19a | 109(3)     |
| C19B | C5B  | N1B  | 108.6(3)   |
| C6B  | C5B  | N1B  | 109.8(3)   |
| C6B  | C5B  | C19B | 112.6(3)   |
| C4B  | C5B  | N1B  | 113.9(3)   |
| C4B  | C5B  | C19B | 108.0(3)   |
| C4B  | C5B  | C6B  | 104.0(3)   |
| C5B  | C6B  | O5B  | 108.9(3)   |
| C3B  | C6B  | O5B  | 110.4(3)   |
| C3B  | C6B  | C5B  | 104.1(3)   |
| H6B  | C6B  | O5B  | 110(3)     |
| H6B  | C6B  | C5B  | 112(3)     |
| H6B  | C6B  | C3B  | 111(3)     |
| C6B  | C3B  | O3B  | 113.9(3)   |
| H3B  | C3B  | O3B  | 108(2)     |
| H3B  | C3B  | C6B  | 105(2)     |
| C2B  | C3B  | O3B  | 115.0(3)   |
| C2B  | C3B  | C6B  | 102.8(3)   |
| C2B  | C3B  | H3B  | 112(2)     |
| C2B  | C1B  | O2B  | 112.0(3)   |
| H1Ba | C1B  | O2B  | 104(2)     |
| H1Ba | C1B  | C2B  | 115(2)     |
| H1Bb | C1B  | O2B  | 108(2)     |
| H1Bb | C1B  | C2B  | 109(2)     |
| H1Bb | C1B  | H1Ba | 108(3)     |
| C1B  | C2B  | C3B  | 114.7(3)   |
| H2Ba | C2B  | C3B  | 109(2)     |
| H2Ba | C2B  | C1B  | 107(2)     |
| C4B  | C2B  | C3B  | 98.8(3)    |
| C4B  | C2B  | C1B  | 115.5(3)   |
| C4B  | C2B  | H2Ba | 111(2)     |
| C2B  | C4B  | C5B  | 103.0(3)   |
| H4Ba | C4B  | C5B  | 110(2)     |
| H4Ba | C4B  | C2B  | 104(2)     |
| H4Bb | C4B  | C5B  | 114(2)     |
| H4Bb | C4B  | C2B  | 110(2)     |
| H4Bb | C4B  | H4Ba | 114(3)     |
| H25B | C25B | N1B  | 114(2)     |
| C24B | C25B | N1B  | 124.0(4)   |
| C24B | C25B | H25B | 122(2)     |
| H24B | C24B | C25B | 118(3)     |
| C23B | C24B | C25B | 118.3(4)   |
| C23B | C24B | H24B | 123(3)     |
| N2B  | C23B | O7B  | 120.2(4)   |
| C24B | C23B | O7B  | 125.4(4)   |
| C24B | C23B | N2B  | 114.4(4)   |
| N1B  | C22B | O8B  | 122.6(4)   |
| N2B  | C22B | O8B  | 121.3(3)   |
| N2B  | C22B | N1B  | 116.1(3)   |
| H7B  | C7B  | Si1B | 107.36(12) |

| Atom | Atom | Atom | Angle/°  |
|------|------|------|----------|
| C8B  | C7B  | Si1B | 113.2(3) |
| C8B  | C7B  | H7B  | 107.4(2) |
| C9B  | C7B  | Si1B | 110.9(3) |
| C9B  | C7B  | H7B  | 107.4(2) |
| C9B  | C7B  | C8B  | 110.4(4) |
| H8Ba | C8B  | C7B  | 109.5    |
| H8Bb | C8B  | C7B  | 109.5    |
| H8Bb | C8B  | H8Ba | 109.5    |
| H8Bc | C8B  | C7B  | 109.5    |
| H8Bc | C8B  | H8Ba | 109.5    |
| H8Bc | C8B  | H8Bb | 109.5    |
| H9Ba | C9B  | C7B  | 109.5    |
| H9Bb | C9B  | C7B  | 109.5    |
| H9Bb | C9B  | H9Ba | 109.5    |
| H9Bc | C9B  | C7B  | 109.5    |
| H9Bc | C9B  | H9Ba | 109.5    |
| H9Bc | C9B  | H9Bb | 109.5    |
| C12B | C10B | Si1B | 111.3(3) |
| C11B | C10B | Si1B | 114.9(3) |
| C11B | C10B | C12B | 111.0(3) |
| H10B | C10B | Si1B | 101(2)   |
| H10B | C10B | C12B | 109(2)   |
| H10B | C10B | C11B | 110(2)   |
| H12a | C12B | C10B | 109.5    |
| H12b | C12B | C10B | 109.5    |
| H12b | C12B | H12a | 109.5    |
| H12c | C12B | C10B | 109.5    |
| H12c | C12B | H12a | 109.5    |
| H12c | C12B | H12b | 109.5    |
| H11a | C11B | C10B | 109.5    |
| H11b | C11B | C10B | 109.5    |
| H11b | C11B | H11a | 109.5    |
| H11c | C11B | C10B | 109.5    |
| H11c | C11B | H11a | 109.5    |
| H11c | C11B | H11b | 109.5    |
| C15B | C13B | Si2B | 111.9(3) |
| C14B | C13B | Si2B | 115.0(3) |
| C14B | C13B | C15B | 110.7(3) |
| H13B | C13B | Si2B | 110(3)   |
| H13B | C13B | C15B | 103(3)   |
| H13B | C13B | C14B | 105(3)   |
| H15a | C15B | C13B | 109.5    |
| H15b | C15B | C13B | 109.5    |
| H15b | C15B | H15a | 109.5    |
| H15c | C15B | C13B | 109.5    |
| H15c | C15B | H15a | 109.5    |
| H15c | C15B | H15b | 109.5    |
| H14a | C14B | C13B | 109.5    |
| H14b | C14B | C13B | 109.5    |
| H14b | C14B | H14a | 109.5    |
| H14c | C14B | C13B | 109.5    |
| H14c | C14B | H14a | 109.5    |
| H14c | C14B | H14b | 109.5    |

| <b>Atom</b> | <b>Atom</b> | <b>Atom</b> | <b>Angle/°</b> |
|-------------|-------------|-------------|----------------|
| C17B        | C16B        | Si2B        | 110.7(3)       |
| C18B        | C16B        | Si2B        | 113.8(3)       |
| C18B        | C16B        | C17B        | 110.4(3)       |
| H16B        | C16B        | Si2B        | 102(2)         |
| H16B        | C16B        | C17B        | 107(3)         |
| H16B        | C16B        | C18B        | 113(3)         |
| H17a        | C17B        | C16B        | 109.5          |
| H17b        | C17B        | C16B        | 109.5          |
| H17b        | C17B        | H17a        | 109.5          |
| H17c        | C17B        | C16B        | 109.5          |
| H17c        | C17B        | H17a        | 109.5          |
| H17c        | C17B        | H17b        | 109.5          |
| H18a        | C18B        | C16B        | 109.5          |
| H18b        | C18B        | C16B        | 109.5          |
| H18b        | C18B        | H18a        | 109.5          |
| H18c        | C18B        | C16B        | 109.5          |
| H18c        | C18B        | H18a        | 109.5          |
| H18c        | C18B        | H18b        | 109.5          |
| O6B         | C20B        | O5B         | 124.5(3)       |
| C21B        | C20B        | O5B         | 111.0(3)       |
| C21B        | C20B        | O6B         | 124.5(4)       |
| H21a        | C21B        | C20B        | 109.5          |
| H21b        | C21B        | C20B        | 109.5          |
| H21b        | C21B        | H21a        | 109.5          |
| H21c        | C21B        | C20B        | 109.5          |
| H21c        | C21B        | H21a        | 109.5          |
| H21c        | C21B        | H21b        | 109.5          |
| O1          | Si1         | O3          | 109.20(13)     |
| C7          | Si1         | O3          | 104.06(17)     |
| C7          | Si1         | O1          | 110.34(17)     |
| C10         | Si1         | O3          | 109.90(17)     |
| C10         | Si1         | O1          | 107.84(16)     |
| C10         | Si1         | C7          | 115.4(2)       |
| O2          | Si2         | O1          | 109.34(13)     |
| C13         | Si2         | O1          | 107.33(17)     |
| C13         | Si2         | O2          | 109.57(18)     |
| C16         | Si2         | O1          | 112.11(17)     |
| C16         | Si2         | O2          | 103.21(18)     |
| C16         | Si2         | C13         | 115.1(2)       |
| C3          | O3          | Si1         | 121.3(2)       |
| Si2         | O1          | Si1         | 154.47(18)     |
| C1          | O2          | Si2         | 123.9(3)       |
| C20         | O5          | C6          | 117.0(3)       |
| H4          | O4          | C19         | 117(4)         |
| C22         | N2          | C23         | 127.0(3)       |
| H2          | N2          | C23         | 114(3)         |
| H2          | N2          | C22         | 119(3)         |
| C4          | C5          | C6          | 104.7(3)       |
| N1          | C5          | C6          | 109.6(3)       |
| N1          | C5          | C4          | 113.7(3)       |
| C19         | C5          | C6          | 113.6(3)       |
| C19         | C5          | C4          | 107.8(3)       |
| C19         | C5          | N1          | 107.5(3)       |

| Atom | Atom | Atom | Angle/°    |
|------|------|------|------------|
| C5   | C6   | O5   | 109.1(3)   |
| H6   | C6   | O5   | 111.29(18) |
| H6   | C6   | C5   | 111.3(2)   |
| C3   | C6   | O5   | 109.3(3)   |
| C3   | C6   | C5   | 104.3(3)   |
| C3   | C6   | H6   | 111.3(2)   |
| C6   | C3   | O3   | 113.8(3)   |
| H3   | C3   | O3   | 108.15(19) |
| H3   | C3   | C6   | 108.1(2)   |
| C2   | C3   | O3   | 115.1(3)   |
| C2   | C3   | C6   | 103.1(3)   |
| C2   | C3   | H3   | 108.15(19) |
| H1a  | C1   | O2   | 109.26(18) |
| H1b  | C1   | O2   | 109.3(2)   |
| H1b  | C1   | H1a  | 107.9      |
| C2   | C1   | O2   | 111.8(3)   |
| C2   | C1   | H1a  | 109.3(2)   |
| C2   | C1   | H1b  | 109.3(2)   |
| C1   | C2   | C3   | 115.3(3)   |
| H2a  | C2   | C3   | 108.35(19) |
| H2a  | C2   | C1   | 108.4(2)   |
| C4   | C2   | C3   | 98.8(3)    |
| C4   | C2   | C1   | 117.0(3)   |
| C4   | C2   | H2a  | 108.4(2)   |
| C2   | C4   | C5   | 103.1(3)   |
| H4a  | C4   | C5   | 111.1(2)   |
| H4a  | C4   | C2   | 111.1(2)   |
| H4c  | C4   | C5   | 111.1(2)   |
| H4c  | C4   | C2   | 111.1(2)   |
| H4c  | C4   | H4a  | 109.1      |
| N2   | C23  | O7   | 120.4(3)   |
| C24  | C23  | O7   | 125.5(4)   |
| C24  | C23  | N2   | 114.1(4)   |
| C25  | C24  | C23  | 119.0(4)   |
| H24  | C24  | C23  | 115(2)     |
| H24  | C24  | C25  | 126(2)     |
| N1   | C25  | C24  | 123.8(4)   |
| H25  | C25  | C24  | 123(2)     |
| H25  | C25  | N1   | 113(3)     |
| C25  | N1   | C5   | 122.6(3)   |
| C22  | N1   | C5   | 117.8(3)   |
| C22  | N1   | C25  | 119.4(3)   |
| N2   | C22  | O8   | 121.1(3)   |
| N1   | C22  | O8   | 122.4(4)   |
| N1   | C22  | N2   | 116.5(3)   |
| C8   | C7   | Si1  | 114.1(3)   |
| C9   | C7   | Si1  | 111.0(3)   |
| C9   | C7   | C8   | 109.9(4)   |
| H7   | C7   | Si1  | 106(2)     |
| H7   | C7   | C8   | 111(2)     |
| H7   | C7   | C9   | 105(2)     |
| H8a  | C8   | C7   | 109.5      |
| H8b  | C8   | C7   | 109.5      |

| Atom | Atom | Atom | Angle/°    |
|------|------|------|------------|
| H8b  | C8   | H8a  | 109.5      |
| H8c  | C8   | C7   | 109.5      |
| H8c  | C8   | H8a  | 109.5      |
| H8c  | C8   | H8b  | 109.5      |
| H9a  | C9   | C7   | 109.5      |
| H9b  | C9   | C7   | 109.5      |
| H9b  | C9   | H9a  | 109.5      |
| H9c  | C9   | C7   | 109.5      |
| H9c  | C9   | H9a  | 109.5      |
| H9c  | C9   | H9b  | 109.5      |
| C12  | C10  | Si1  | 111.5(3)   |
| C11  | C10  | Si1  | 114.2(3)   |
| C11  | C10  | C12  | 111.1(3)   |
| H10  | C10  | Si1  | 106(2)     |
| H10  | C10  | C12  | 104(2)     |
| H10  | C10  | C11  | 110(2)     |
| H12d | C12  | C10  | 109.5      |
| H12e | C12  | C10  | 109.5      |
| H12e | C12  | H12d | 109.5      |
| H12f | C12  | C10  | 109.5      |
| H12f | C12  | H12d | 109.5      |
| H12f | C12  | H12e | 109.5      |
| H11d | C11  | C10  | 109.5      |
| H11e | C11  | C10  | 109.5      |
| H11e | C11  | H11d | 109.5      |
| H11f | C11  | C10  | 109.5      |
| H11f | C11  | H11d | 109.5      |
| H11f | C11  | H11e | 109.5      |
| H13  | C13  | Si2  | 106.25(14) |
| C15  | C13  | Si2  | 112.9(3)   |
| C15  | C13  | H13  | 106.2(3)   |
| C14  | C13  | Si2  | 114.0(3)   |
| C14  | C13  | H13  | 106.2(3)   |
| C14  | C13  | C15  | 110.5(4)   |
| H15d | C15  | C13  | 109.5      |
| H15e | C15  | C13  | 109.5      |
| H15e | C15  | H15d | 109.5      |
| H15f | C15  | C13  | 109.5      |
| H15f | C15  | H15d | 109.5      |
| H15f | C15  | H15e | 109.5      |
| H14d | C14  | C13  | 109.5      |
| H14e | C14  | C13  | 109.5      |
| H14e | C14  | H14d | 109.5      |
| H14f | C14  | C13  | 109.5      |
| H14f | C14  | H14d | 109.5      |
| H14f | C14  | H14e | 109.5      |
| H16  | C16  | Si2  | 106.87(13) |
| C18  | C16  | Si2  | 114.9(3)   |
| C18  | C16  | H16  | 106.9(2)   |
| C17  | C16  | Si2  | 110.5(3)   |
| C17  | C16  | H16  | 106.9(3)   |
| C17  | C16  | C18  | 110.4(4)   |
| H18d | C18  | C16  | 109(3)     |

| Atom   | Atom   | Atom   | Angle/°           |
|--------|--------|--------|-------------------|
| H18e   | C18    | C16    | 110(3)            |
| H18e   | C18    | H18d   | 112(4)            |
| H18f   | C18    | C16    | 113(3)            |
| H18f   | C18    | H18d   | 98(4)             |
| H18f   | C18    | H18e   | 115(4)            |
| H17d   | C17    | C16    | 109.5             |
| H17e   | C17    | C16    | 109.5             |
| H17e   | C17    | H17d   | 109.5             |
| H17f   | C17    | C16    | 109.5             |
| H17f   | C17    | H17d   | 109.5             |
| H17f   | C17    | H17e   | 109.5             |
| O6     | C20    | O5     | 124.4(4)          |
| C21    | C20    | O5     | 112.3(3)          |
| C21    | C20    | O6     | 123.3(4)          |
| H21d   | C21    | C20    | 109.5             |
| H21e   | C21    | C20    | 109.5             |
| H21e   | C21    | H21d   | 109.5             |
| H21f   | C21    | C20    | 109.5             |
| H21f   | C21    | H21d   | 109.5             |
| H21f   | C21    | H21e   | 109.5             |
| C5     | C19    | O4     | 112.9(3)          |
| H19c   | C19    | O4     | 109.00(19)        |
| H19c   | C19    | C5     | 109.0(2)          |
| H19d   | C19    | O4     | 109.00(18)        |
| H19d   | C19    | C5     | 109.00(19)        |
| H19d   | C19    | H19c   | 107.787076690(16) |
| H1Wb   | O1W    | H1Wa   | 115(4)            |
| H1Wd   | O1WB   | H1Wc   | 106(3)            |
| C1S_1  | O1S_1  | H1S_1  | 107.5(7)          |
| H1Sa_1 | C1S_1  | O1S_1  | 109.5             |
| H1Sb_1 | C1S_1  | O1S_1  | 109.5             |
| H1Sb_1 | C1S_1  | H1Sa_1 | 109.5             |
| H1Sc_1 | C1S_1  | O1S_1  | 109.5             |
| H1Sc_1 | C1S_1  | H1Sa_1 | 109.5             |
| H1Sc_1 | C1S_1  | H1Sb_1 | 109.5             |
| C1SB_2 | O1SB_2 | H1SB_2 | 107.7(7)          |
| H1Sa_2 | C1SB_2 | O1SB_2 | 109.5             |
| H1Sc_2 | C1SB_2 | O1SB_2 | 109.5             |
| H1Sc_2 | C1SB_2 | H1Sa_2 | 109.5             |
| H1Sd_2 | C1SB_2 | O1SB_2 | 109.5             |
| H1Sd_2 | C1SB_2 | H1Sa_2 | 109.5             |
| H1Sd_2 | C1SB_2 | H1Sc_2 | 109.5             |

**Table 5:** Torsion Angles in ° for **9A**.

| Atom | Atom | Atom | Atom | Angle/°   |
|------|------|------|------|-----------|
| Si1B | O3B  | C3B  | C6B  | 130.8(3)  |
| Si1B | O3B  | C3B  | C2B  | -110.8(3) |
| Si1B | O1B  | Si2B | O2B  | -2.4(4)   |
| Si1B | O1B  | Si2B | C13B | 115.3(4)  |
| Si1B | O1B  | Si2B | C16B | -116.8(4) |
| Si2B | O2B  | C1B  | C2B  | -110.6(3) |
| O3B  | C3B  | C6B  | O5B  | 39.5(3)   |

| Atom | Atom | Atom | Atom | Angle/°   |
|------|------|------|------|-----------|
| O3B  | C3B  | C6B  | C5B  | 156.3(3)  |
| O3B  | C3B  | C2B  | C1B  | 62.5(3)   |
| O3B  | C3B  | C2B  | C4B  | -174.1(3) |
| O2B  | C1B  | C2B  | C3B  | 54.3(4)   |
| O2B  | C1B  | C2B  | C4B  | -59.7(4)  |
| O8B  | C22B | N1B  | C5B  | -1.3(5)   |
| O8B  | C22B | N1B  | C25B | -175.5(4) |
| O8B  | C22B | N2B  | C23B | 179.1(4)  |
| O7B  | C23B | N2B  | C22B | 177.5(4)  |
| O7B  | C23B | C24B | C25B | -176.7(4) |
| O5B  | C6B  | C5B  | N1B  | -120.8(3) |
| O5B  | C6B  | C5B  | C19B | 0.3(3)    |
| O5B  | C6B  | C5B  | C4B  | 116.9(3)  |
| O5B  | C6B  | C3B  | C2B  | -85.5(3)  |
| O4B  | C19B | C5B  | N1B  | -44.3(3)  |
| O4B  | C19B | C5B  | C6B  | -166.1(3) |
| O4B  | C19B | C5B  | C4B  | 79.7(3)   |
| N1B  | C5B  | C6B  | C3B  | 121.4(3)  |
| N1B  | C5B  | C4B  | C2B  | -149.6(3) |
| N1B  | C25B | C24B | C23B | 0.4(5)    |
| N1B  | C22B | N2B  | C23B | -2.1(5)   |
| N2B  | C23B | C24B | C25B | 3.1(4)    |
| C19B | C5B  | C6B  | C3B  | -117.5(3) |
| C19B | C5B  | C4B  | C2B  | 89.8(3)   |
| C5B  | C6B  | C3B  | C2B  | 31.2(3)   |
| C5B  | C4B  | C2B  | C3B  | 49.1(3)   |
| C5B  | C4B  | C2B  | C1B  | 172.0(3)  |
| C6B  | C3B  | C2B  | C1B  | -173.2(3) |
| C6B  | C3B  | C2B  | C4B  | -49.7(3)  |
| Si1  | O3   | C3   | C6   | 131.6(3)  |
| Si1  | O3   | C3   | C2   | -109.7(3) |
| Si1  | O1   | Si2  | O2   | 2.0(5)    |
| Si1  | O1   | Si2  | C13  | 120.8(5)  |
| Si1  | O1   | Si2  | C16  | -111.8(5) |
| Si2  | O2   | C1   | C2   | -108.8(3) |
| O3   | C3   | C6   | O5   | 39.4(3)   |
| O3   | C3   | C6   | C5   | 156.0(3)  |
| O3   | C3   | C2   | C1   | 61.3(3)   |
| O3   | C3   | C2   | C4   | -173.1(3) |
| O2   | C1   | C2   | C3   | 55.4(4)   |
| O2   | C1   | C2   | C4   | -60.2(4)  |
| O8   | C22  | N2   | C23  | 178.7(4)  |
| O8   | C22  | N1   | C5   | -0.6(5)   |
| O8   | C22  | N1   | C25  | -176.7(4) |
| O7   | C23  | N2   | C22  | 178.5(4)  |
| O7   | C23  | C24  | C25  | -176.9(4) |
| O5   | C6   | C5   | C4   | 116.0(3)  |
| O5   | C6   | C5   | N1   | -121.7(3) |
| O5   | C6   | C5   | C19  | -1.4(3)   |
| O5   | C6   | C3   | C2   | -86.0(3)  |
| O4   | C19  | C5   | C6   | -164.5(3) |
| O4   | C19  | C5   | C4   | 79.9(3)   |
| O4   | C19  | C5   | N1   | -43.0(3)  |

| Atom | Atom | Atom | Atom | Angle/°   |
|------|------|------|------|-----------|
| N2   | C23  | C24  | C25  | 2.2(4)    |
| N2   | C22  | N1   | C5   | -178.9(3) |
| N2   | C22  | N1   | C25  | 5.1(4)    |
| C5   | C6   | C3   | C2   | 30.6(3)   |
| C5   | C4   | C2   | C3   | 47.9(3)   |
| C5   | C4   | C2   | C1   | 172.4(3)  |
| C5   | N1   | C25  | C24  | -179.6(4) |
| C6   | C3   | C2   | C1   | -174.1(3) |
| C6   | C3   | C2   | C4   | -48.5(3)  |
| C23  | C24  | C25  | N1   | -0.1(5)   |
| C24  | C25  | N1   | C22  | -3.8(5)   |

**Table 6:** Hydrogen Fractional Atomic Coordinates ( $\times 10^4$ ) and Equivalent Isotropic Displacement Parameters ( $\text{\AA}^2 \times 10^3$ ) for **9A**.  $U_{eq}$  is defined as 1/3 of the trace of the orthogonalised  $U_{ij}$ .

| Atom | x         | y         | z        | $U_{eq}$ |
|------|-----------|-----------|----------|----------|
| H2B  | -2010(40) | 7330(40)  | 5750(30) | 44(14)   |
| H3B  | 170(50)   | 8800(50)  | 2910(20) | 16(5)    |
| H2Ba | 1950(50)  | 6770(50)  | 2910(20) | 20(5)    |
| H25B | 2620(50)  | 10290(50) | 4700(20) | 28(10)   |
| H24B | 2010(60)  | 11600(60) | 5670(30) | 44(13)   |
| H7B  | -2354(5)  | 5391(5)   | 860(2)   | 35.2(13) |
| H8Ba | -1320(20) | 8190(30)  | 95(3)    | 47.0(15) |
| H8Bb | -2331(7)  | 6220(20)  | -296(14) | 47.0(15) |
| H8Bc | -3280(30) | 6997(5)   | 262(3)   | 47.0(15) |
| H9Ba | 387(14)   | 5853(13)  | 1077(13) | 49.6(16) |
| H9Bb | -369(10)  | 5370(30)  | 172(13)  | 49.6(16) |
| H9Bc | 870(30)   | 7390(30)  | 516(4)   | 49.6(16) |
| H12a | -4132(6)  | 5840(20)  | 2096(7)  | 32(5)    |
| H12b | -5200(20) | 6932(7)   | 2023(6)  | 34(5)    |
| H12c | -4691(11) | 6214(13)  | 1285(13) | 33(5)    |
| H11a | -3340(30) | 9092(14)  | 1003(4)  | 27(4)    |
| H11b | -3820(20) | 9690(20)  | 1698(10) | 34(5)    |
| H11c | -2002(10) | 10439(11) | 1551(13) | 33(4)    |
| H15a | 5810(20)  | 12208(6)  | 818(11)  | 50.0(16) |
| H15b | 5032(5)   | 13420(30) | 1163(3)  | 50.0(16) |
| H15c | 5611(16)  | 12320(5)  | 1694(15) | 50.0(16) |
| H14a | 2549(6)   | 12100(30) | 331(2)   | 50.9(16) |
| H14b | 3320(20)  | 10879(6)  | -57(12)  | 50.9(16) |
| H14c | 1450(40)  | 10030(30) | 254(4)   | 50.9(16) |
| H17a | 1372(5)   | 13650(30) | 2964(6)  | 36(5)    |
| H17b | 130(30)   | 11670(20) | 2640(4)  | 39(4)    |
| H17c | 1909(15)  | 12152(11) | 3175(11) | 35(5)    |
| H18a | 380(30)   | 12680(20) | 1404(5)  | 34(4)    |
| H18b | 1643(5)   | 14580(30) | 1825(6)  | 36(5)    |
| H18c | 2301(18)  | 13723(8)  | 1163(11) | 35(5)    |
| H21a | -2300(30) | 2293(9)   | 2845(10) | 60.0(18) |
| H21b | -3012(6)  | 2164(13)  | 3644(16) | 60.0(18) |
| H21c | -4260(40) | 1880(20)  | 2896(8)  | 60.0(18) |
| H6B  | -1530(70) | 7070(70)  | 3620(30) | 60.0(18) |
| H1Ba | 2720(50)  | 8330(50)  | 1910(20) | 24(5)    |
| H1Bb | 4350(50)  | 9060(50)  | 2640(20) | 25(5)    |

| Atom | x         | y         | z         | $U_{eq}$ |
|------|-----------|-----------|-----------|----------|
| H4Ba | 2330(50)  | 9760(50)  | 3710(20)  | 24(5)    |
| H4Bb | 3530(50)  | 8640(50)  | 3930(20)  | 20(5)    |
| H10B | -2330(60) | 8660(60)  | 2450(30)  | 30(5)    |
| H13B | 3640(60)  | 9940(60)  | 990(30)   | 44(8)    |
| H16B | 3500(60)  | 13480(60) | 2310(20)  | 31(6)    |
| H19a | 1870(50)  | 5800(50)  | 3850(20)  | 28(6)    |
| H19b | 240(50)   | 5070(50)  | 4390(20)  | 28(6)    |
| H4B  | 3420(30)  | 7400(60)  | 4940(30)  | 48(15)   |
| H6   | 6917(9)   | 100(40)   | 6355(6)   | 20(5)    |
| H3   | 9040(40)  | 2166(4)   | 7097(3)   | 22(5)    |
| H1a  | 9341(5)   | 6290(30)  | 7424(4)   | 28(5)    |
| H1b  | 8877(12)  | 5005(6)   | 8079(15)  | 22(5)    |
| H2a  | 6790(40)  | 3846(4)   | 7084(2)   | 21(5)    |
| H4a  | 8265(4)   | 4775(4)   | 6088(2)   | 25(5)    |
| H4c  | 9424(4)   | 3950(4)   | 6233(2)   | 24(5)    |
| H8a  | 9152(11)  | 700(20)   | 9838(2)   | 36(5)    |
| H8b  | 9790(30)  | 2740(30)  | 9890(3)   | 33(4)    |
| H8c  | 8151(16)  | 1568(5)   | 10296(11) | 37(5)    |
| H9a  | 6444(17)  | 2551(6)   | 9726(14)  | 52(6)    |
| H9b  | 7980(30)  | 3820(30)  | 9240(3)   | 52(5)    |
| H9c  | 6100(30)  | 2362(9)   | 8789(13)  | 52(5)    |
| H12d | 7483(5)   | -2870(30) | 7845(8)   | 35(5)    |
| H12e | 7207(7)   | -2108(8)  | 8679(15)  | 38(5)    |
| H12f | 6350(30)  | -1740(6)  | 7886(7)   | 36(5)    |
| H11d | 10136(7)  | -499(6)   | 9053(14)  | 35(5)    |
| H11e | 10468(6)  | -1400(30) | 8318(6)   | 35(5)    |
| H11f | 11370(30) | 640(30)   | 8486(3)   | 35(4)    |
| H13  | 11130(50) | 6267(6)   | 9107(6)   | 32(5)    |
| H15d | 12803(15) | 8196(11)  | 8381(12)  | 38(6)    |
| H15e | 13622(9)  | 8720(20)  | 9327(13)  | 42(5)    |
| H15f | 14530(30) | 7813(5)   | 8707(4)   | 40(5)    |
| H14d | 12047(16) | 4730(20)  | 9764(10)  | 49(4)    |
| H14e | 13820(20) | 5640(40)  | 9568(6)   | 49(5)    |
| H14f | 13090(40) | 6560(20)  | 10033(5)  | 49(5)    |
| H16  | 14080(30) | 5620(50)  | 7694(7)   | 31(5)    |
| H17d | 12204(15) | 3806(14)  | 6780(11)  | 46(6)    |
| H17e | 13680(30) | 3144(8)   | 6982(6)   | 46(6)    |
| H17f | 11780(30) | 2180(30)  | 7282(4)   | 49(5)    |
| H21d | 2095(15)  | -2340(30) | 7156(8)   | 41(4)    |
| H21e | 2569(5)   | -230(30)  | 7223(9)   | 42(4)    |
| H21f | 1900(20)  | -1427(7)  | 6376(14)  | 44(4)    |
| H19c | 5448(6)   | 3340(20)  | 6070(11)  | 23(4)    |
| H19d | 4550(30)  | 1420(30)  | 5608(3)   | 22(3)    |
| H24  | 10480(50) | 2450(50)  | 4270(20)  | 21(8)    |
| H25  | 9650(60)  | 3560(60)  | 5340(30)  | 51(13)   |
| H2   | 6230(40)  | -1530(20) | 4220(20)  | 22(10)   |
| H7   | 6530(60)  | 130(60)   | 9130(20)  | 32(4)    |
| H10  | 9060(50)  | -310(50)  | 7570(20)  | 24(5)    |
| H18d | 13560(60) | 2970(70)  | 8570(30)  | 41(5)    |
| H18e | 15290(60) | 3780(70)  | 8030(30)  | 44(6)    |
| H18f | 14790(60) | 4760(70)  | 8770(30)  | 43(4)    |
| H4   | 6690(50)  | 4230(40)  | 5020(30)  | 51(14)   |
| H1Wa | 4830(90)  | -3640(70) | 3332(9)   | 58(16)   |

| Atom   | x         | y         | z        | $U_{eq}$ |
|--------|-----------|-----------|----------|----------|
| H1Wb   | 4430(100) | -4480(40) | 4030(30) | 65(17)   |
| H1Wc   | -3960(70) | 7180(60)  | 6400(40) | 61(16)   |
| H1Wd   | -4780(40) | 5710(60)  | 5880(30) | 40(14)   |
| H1S_1  | 4180(30)  | 3470(50)  | 4639(7)  | 38(16)   |
| H1Sa_1 | 1891(8)   | 3974(8)   | 5297(4)  | 26(7)    |
| H1Sb_1 | 3557(8)   | 3740(8)   | 5644(4)  | 29(7)    |
| H1Sc_1 | 3805(8)   | 5584(8)   | 5383(4)  | 18(7)    |
| H1SB_2 | 2770(40)  | 5210(30)  | 5344(8)  | 36(16)   |
| H1Sa_2 | 4587(8)   | 4531(8)   | 4601(4)  | 22(7)    |
| H1Sc_2 | 2973(8)   | 2669(8)   | 4644(4)  | 21(7)    |
| H1Sd_2 | 2630(8)   | 4216(8)   | 4325(4)  | 26(7)    |

**Table 7:** Hydrogen Bond information for **9A**.

| D      | H      | A                   | d(D-H)/Å   | d(H-A)/Å  | d(D-A)/Å | D-H-A/deg |
|--------|--------|---------------------|------------|-----------|----------|-----------|
| N2B    | H2B    | O1WB                | 0.982(3)   | 1.833(6)  | 2.805(4) | 170(3)    |
| O4B    | H4B    | O8 <sup>1</sup>     | 0.9550(17) | 1.86(3)   | 2.748(4) | 153(6)    |
| N2     | H2     | O1W                 | 0.9819(15) | 1.829(4)  | 2.811(4) | 178(4)    |
| O4     | H4     | O8B <sup>2</sup>    | 0.9550(17) | 1.811(17) | 2.747(4) | 166(6)    |
| O1W    | H1Wb   | O1S_1 <sup>3</sup>  | 0.948(16)  | 1.93(2)   | 2.865(6) | 167(6)    |
| O1WB   | H1Wc   | O6 <sup>4</sup>     | 0.960(16)  | 1.96(3)   | 2.857(4) | 155(5)    |
| O1WB   | H1Wd   | O1SB_2 <sup>5</sup> | 0.955(16)  | 1.888(19) | 2.839(6) | 174(6)    |
| O1S_1  | H1S_1  | O4                  | 0.9751(17) | 1.753(3)  | 2.682(5) | 158.0(12) |
| O1SB_2 | H1SB_2 | O4B                 | 0.9752(17) | 1.753(3)  | 2.672(5) | 155.6(12) |

-----  
<sup>1</sup>+x,1+y,+z; <sup>2</sup>1+x,+y,+z; <sup>3</sup>+x,-1+y,+z; <sup>4</sup>-1+x,1+y,+z; <sup>5</sup>-1+x,+y,+z

**Table 8:** Atomic Occupancies for all atoms that are not fully occupied in **9A**.

| Atom   | Occupancy |
|--------|-----------|
| O1S_1  | 0.500000  |
| H1S_1  | 0.500000  |
| C1S_1  | 0.500000  |
| H1Sa_1 | 0.500000  |
| H1Sb_1 | 0.500000  |
| H1Sc_1 | 0.500000  |
| O1SB_2 | 0.500000  |
| H1SB_2 | 0.500000  |
| C1SB_2 | 0.500000  |
| H1Sa_2 | 0.500000  |
| H1Sc_2 | 0.500000  |
| H1Sd_2 | 0.500000  |

**Table 9. Antiviral activity of compounds 1-4.**

| Compound                              | SARS CoV-2 activity <sup>2</sup><br>in |                                 |                                 | Influenza<br>A <sup>3</sup>   | Influenza<br>B <sup>3</sup>   | Norwalk <sup>4</sup>             | RSV <sup>5</sup>                  |
|---------------------------------------|----------------------------------------|---------------------------------|---------------------------------|-------------------------------|-------------------------------|----------------------------------|-----------------------------------|
|                                       | Vero<br>(EC <sub>50</sub> μM)          | Calu-3<br>(EC <sub>50</sub> μM) | Caco-2<br>(EC <sub>50</sub> μM) | A549<br>(EC <sub>50</sub> μM) | A549<br>(EC <sub>50</sub> μM) | Huh7<br>(EC <sub>50</sub><br>μM) | Hep-2<br>(EC <sub>50</sub><br>μM) |
| <b>1</b>                              | >10                                    | >10                             | >10                             | >40                           | >40                           | >10                              | >10                               |
| <b>2</b>                              | >10                                    | >10                             | >10                             | >40                           | >40                           | >10                              | >10                               |
| <b>3</b>                              | >10                                    | >10                             | >10                             | >40                           | >40                           | >10                              | >10                               |
| <b>4</b>                              | >10                                    | >10                             | >10                             | >40                           | >40                           | >10                              | >10                               |
| <b>CNC</b>                            | 2.1                                    | 0.7                             | 0.02                            | NA                            | NA                            | NA                               | NA                                |
| <b>Remdesivir<sup>a</sup></b>         | 1.8                                    | 0.2                             | 0.02                            | NA                            | NA                            | NA                               | 0.2                               |
| <b>VX-787<sup>a</sup></b>             | NA                                     | NA                              | NA                              | 0.051                         | NA                            | NA                               | NA                                |
| <b>Baloxavir<br/>acid<sup>a</sup></b> | NA                                     | NA                              | NA                              | NA                            | 0.15                          | NA                               | NA                                |
| <b>2'Me-C<sup>a</sup></b>             | NA                                     | NA                              | NA                              | NA                            | NA                            | 2.8                              | NA                                |

<sup>a</sup> Positive controls, 2'Me-C: 2'-C-methylecytidine, CNC: 1'-Cyanocytidine, NA: Not applicable

**Table 10. Cytotoxicity profile of compounds 1-4**

| Compound | Cytotoxicity - CC <sub>50</sub> (μM) |      |      |       |
|----------|--------------------------------------|------|------|-------|
|          | PBM                                  | CEM  | Vero | Huh-7 |
| <b>1</b> | >100                                 | >100 | >100 | >100  |
| <b>2</b> | >100                                 | >100 | >100 | >100  |
| <b>3</b> | >100                                 | >100 | >100 | >100  |
| <b>4</b> | >100                                 | >100 | >100 | >100  |

**References:**

1 (a) CrysAlisPro (Rigaku, V1.171.42.74a, 2022). (b) CrysAlisPro (ROD), Rigaku Oxford Diffraction, Poland. (c) L.J. Bourhis and O.V. Dolomanov and R.J. Gildea and J.A.K. Howard and

- H. Puschmann, The Anatomy of a Comprehensive Constrained, Restrained, Refinement Program for the Modern Computing Environment - Olex2 Disected, *Acta Cryst. A*, (2015), **A71**, 59-71. (d) O.V. Dolomanov and L.J. Bourhis and R.J. Gildea and J.A.K. Howard and H. Puschmann, Olex2: A complete structure solution, refinement and analysis program, *J. Appl. Cryst.*, (2009), **42**, 339-341. (e) Sheldrick, G.M., ShelXT-Integrated space-group and crystal-structure determination, *Acta Cryst.*, (2015), **A71**, 3-8.
2. F. Amblard, M. Kasthuri, J. C. LeCher, S. Tao, R. De, R. Abdelnabi, I. Marko, L. Zhou, C. Li, J. Shi, S. L. Goh, J. Downs-Bowen, L. Bassit, S. Hurwitz, K. Zandi, T. McBrayer, B. Weynand, K. A. Johnson, J. Neyts and R. F. Schinazi, 1'-Cyanocytidine-5'-Isobutyryl Is a Potent SARS-CoV-2 Inhibitor in Culture and Infected Syrian Hamsters. *Sci. Adv.* **2025**, *11*, eadz5913.
3. H. Zhang, L. Zhou, S. Amichai, K. Zandi, B. Cox, R. F. Schinazi, F. Amblard. Novel influenza polymerase PB2 inhibitors for the treatment of influenza A infection. *Bioorganic & Medicinal Chemistry Letters*. **2019**, *29*, 126639.
4. F. Amblard, S. Zhou, P. Liu, J. Yoon, B. Cox, K. Muzzarelli, B. D. Kuiper, L. C. Kovari, R. F. Schinazi. Synthesis and antiviral evaluation of novel peptidomimetics as norovirus protease inhibitors. *Bioorganic & Medicinal Chemistry Letters*. **2018**, *28*, 2165–2170.
5. M. Kasthuri, C. Li, K. Verma, O. O. Russell, L. Dickson, L. McCormick, L. Bassit, F. Amblard, R. F. Schinazi. Synthesis of 4'-Substituted-2'-Deoxy-2'- $\alpha$ -Fluoro Nucleoside Analogs as Potential Antiviral Agents. *Molecules* 2020, *25*, 1258; doi:10.3390/molecules25061258.
